# Supplementary material for: Genome-wide association studies dissect the G × E interaction for agronomic traits in a worldwide collection of safflowers (Carthamus tinctorius L.)
Source: Mol Breed. 2022 Apr 12;42(4):24. doi: 10.1007/s11032-022-01295-8 (PMC10248593; doi:10.1007/s11032-022-01295-8)
Supplement: Supplementary file 2 — Supplementary file2 (XLSX 121 KB) [file 11032_2022_1295_MOESM2_ESM.xlsx]

## Sheet: Sheet1
	Title page
	Genome-wide association studies dissect the G×E interaction for agronomic traits in a worldwide collection of safflower (Carthamus tinctorius L.)
	Huanhuan Zhao1,2*, Keith W. Savin2, Yongjun Li2, Edmond J Breen2, Pankaj Maharjan3, Josquin F. Tibbits2, Surya Kant1,3, Matthew J. Hayden1,2, Hans D. Daetwyler1,2
	1 School of Applied Systems Biology, La Trobe University, Bundoora, VIC 3083, Australia
	2 Agriculture Victoria, AgriBio, Centre for AgriBioscience, Bundoora, VIC 3083, Australia
	3 Agriculture Victoria, Grains Innovation Park, Horsham, VIC 3400, Australia
	* Corresponding author Huanhuan Zhao, huan.zhao@agriculture.vic.gov.au
	ORCID Huanhuan Zhao https://orcid.org/0000-0001-6565-9314
	Hans D Daetwyler https://orcid.org/0000-0002-3018-3640

## Sheet: supp_1
Supplementary Table s1. The BLUEs of 318 safflower accessions for grain yield (YP), plant height (PH), days to flowering (DF), 500 seed weight (SW), seed protein (PR), and oil content (OL) at each site.
Accessions	DF	OL	PH	PR	SW	YP	Site
S5	165.194	32.6666	133.087	15.4144	16.3054	1.08177	1
S34	156.558	27.9967	118.694	14.3464	19.0406	2.07121	1
S50	159.447	27.6314	124.647	14.5644	20.4985	2.71526	1
S58	161.974	28.3929	127.144	15.7987	20.0989	1.45236	1
S66	154.937	33.007	113.308	15.4999	20.4757	2.57151	1
S75	156.557	35.5567	121.543	14.8835	19.2026	2.29405	1
S83	160.862	37.6739	85.185	15.4035	18.9965	1.67908	1
S108	156.273	36.1111	110.419	15.1877	21.6247	2.53935	1
S124	156.463	30.3564	101.328	14.9399	20.3179	1.87777	1
S8	156.666	30.5516	104.001	15.6637	20.4856	1.46052	1
S51	161.161	30.6745	108.726	14.6793	20.5713	1.56194	1
S67	159.446	34.2261	103.645	14.4867	19.8484	1.32346	1
S76	157.638	35.2298	108.937	14.8829	21.0945	1.9807	1
S93	159.075	33.9504	114.338	15.1218	18.2194	2.63119	1
S101	155.055	32.3786	82.0383	14.2968	18.7501	1.29584	1
S117	157.447	32.979	109.511	15.4591	23.37	1.82983	1
S125	158.012	31.152	122.056	15.6735	24.4951	1.4417	1
S12	160.648	29.5099	100.301	15.3951	21.9981	2.18309	1
S41	161.351	30.999	118.075	14.1008	16.258	2.80457	1
S52	161.287	31.9406	121.307	15.1528	17.7192	2.04466	1
S60	161.772	41.1836	100.115	17.073	13.9964	1.26123	1
S69	158.254	32.0532	114.363	15.4801	21.8	2.04098	1
S77	157.104	35.6068	109.827	15.2735	18.602	2.13645	1
S85	156.623	34.5002	116.704	15.1865	17.0046	1.97973	1
S94	156.41	32.047	98.1829	15.0233	17.9307	2.75985	1
S102	157.175	31.8394	123.099	15.0187	18.892	1.98756	1
S110	152.16	30.9775	101.081	15.198	19.3734	1.41923	1
S13	153.511	27.788	95.891	13.88	26.2595	1.83692	1
S43	154.213	24.5421	108.665	15.9862	25.89	1.26524	1
S53	162.37	29.2676	133.38	15.3147	16.9354	2.62595	1
S61	153.851	31.581	106.721	15.0332	21.5986	1.78216	1
S70	156.392	36.0089	106.024	15.747	18.5338	1.78206	1
S78	157.58	33.4628	97.7223	15.3155	19.9812	1.49703	1
S86	153.663	29.6896	117.912	14.9614	20.3065	2.32117	1
S95	157.378	32.5373	107.512	14.8045	18.5715	2.53914	1
S103	154.925	29.5515	87.0675	14.975	18.2914	0.582846	1
S127	156.144	33.1593	108.009	16.0394	22.1684	2.21711	1
S45	156.861	27.8627	114.934	14.722	24.5276	2.58591	1
S62	157.576	31.3718	94.8167	14.8298	22.1406	0.986198	1
S71	157.74	37.5494	108.375	14.6279	17.5997	2.16863	1
S79	159.815	34.4804	91.549	16.2416	19.9298	1.73328	1
S96	156.252	31.772	110.159	15.1068	21.045	2.4888	1
S120	156.682	27.4434	89.0953	14.7265	28.2554	1.27197	1
S128	159.449	30.5112	108.398	15.9927	17.0942	1.75899	1
S19	158.595	28.4939	112.955	13.9203	25.5518	2.54161	1
S55	161.075	31.68	114.563	15.0256	19.0032	2.41967	1
S63	156.907	36.0262	104.143	15.0314	16.8487	2.13158	1
S72	155.871	36.2403	104.007	15.0027	16.6358	1.47423	1
S80	156.896	34.5372	105.811	14.7414	19.032	2.03726	1
S97	156.323	31.6897	118.63	14.5166	19.3654	2.82112	1
S129	154.869	34.4532	111.196	15.3877	21.0193	1.93655	1
S30	159.109	27.7714	133.398	15.3788	27.3933	1.74126	1
S47	161.668	30.0941	120.956	14.5569	18.8401	2.4815	1
S56	158.28	30.0334	126.111	15.4394	19.7985	1.97181	1
S64	157.045	35.0682	110.888	14.8263	19.0808	2.51949	1
S90	160.323	34.9433	113.46	14.6806	19.6702	2.54226	1
S98	160.51	31.3503	121.134	14.995	18.5547	1.85621	1
S114	155.359	28.7669	121.264	14.8083	25.718	2.50391	1
S122	154.149	29.7046	108.535	14.7054	23.6703	1.96821	1
S130	157.201	39.955	114.717	15.4254	16.0468	2.05276	1
S31	157.162	29.4867	103.762	15.2379	23.5251	1.8413	1
S49	159.466	28.9297	123.179	15.182	18.4632	2.43778	1
S57	162.022	34.1755	107.859	15.0799	18.1432	2.41613	1
S65	156.053	31.2936	117.942	15.6845	21.8315	1.75134	1
S74	157.541	35.4186	107.536	14.5122	20.9734	1.77011	1
S82	162.726	39.5325	82.2187	14.9891	18.5078	1.82728	1
S91	155.639	33.1005	104.25	15.4325	18.279	2.23452	1
S99	158.306	28.0882	119.993	15.7014	25.7137	1.8521	1
S115	156.907	31.1831	111.053	14.9844	24.0756	2.40426	1
S131	156.983	34.4159	111.595	15.2488	18.6023	2.49213	1
S132	156.738	37.0508	115.061	14.8505	18.5026	2.33549	1
S140	160.734	33.455	109.054	16.0722	16.0027	1.15697	1
S148	160.32	28.8454	132.66	15.2587	17.6944	2.03556	1
S157	161.107	31.4892	110.864	14.956	20.1998	1.74669	1
S165	157.164	30.5018	127.822	14.3996	25.4826	2.0985	1
S174	159.726	33.1759	98.7452	15.9788	16.4976	2.04736	1
S183	161.109	31.5508	126.538	15.4749	16.8756	1.71722	1
S192	157.6	41.9243	120.099	14.1838	16.1612	2.45304	1
S211	162.755	28.0563	133.018	14.321	19.7467	2.11444	1
S219	161.898	31.5701	96.9119	15.5195	19.8792	1.5046	1
S133	158.313	36.1943	101.676	14.8596	21.2119	2.38153	1
S141	158.661	36.0059	97.8736	15.3261	19.602	1.01944	1
S149	157.511	30.3848	125.493	15.0289	18.0289	1.85692	1
S158	162.479	29.0595	129.396	14.1214	22.5575	1.8589	1
S166	161.686	33.7792	111.156	15.3689	14.5726	1.26511	1
S175	161.386	40.384	105.795	15.4277	15.0189	1.84856	1
S184	166.074	33.1095	108.274	15.1568	15.6488	0.825181	1
S194	158.556	35.4442	101.166	15.2775	18.3025	2.60156	1
S228	157.89	30.8218	115.194	14.6715	19.6758	1.74415	1
S134	157.545	34.7382	100.809	15.1228	18.2244	1.87072	1
S142	159.719	31.9207	111.229	15.9542	18.4168	2.0561	1
S150	160.154	33.5466	108.593	15.9579	17.3851	1.86207	1
S159	158.738	35.5359	113.888	17.3179	16.786	0.92879	1
S167	158.083	39.2672	97.4199	17.7043	15.9928	1.02517	1
S176	160.604	40.3725	107.448	14.9467	14.8904	1.60681	1
S185	155.776	26.388	104.98	13.9892	25.2104	2.12885	1
S195	160.819	36.4588	90.6371	14.8717	19.5897	1.11903	1
S205	157.634	27.0654	103.96	14.437	26.5149	2.56143	1
S213	163.527	33.8949	91.0104	16.8931	20.0312	0.203593	1
S221	157.816	31.8795	109.754	14.2892	23.6607	2.00552	1
S229	154.582	30.7416	100.425	14.6871	24.0006	1.47422	1
S135	158.757	30.4593	119.52	14.9199	19.6098	2.63962	1
S143	159.993	30.7003	121.838	14.2604	18.5492	2.16188	1
S151	160.045	30.1522	107.822	15.85	23.0433	2.42319	1
S160	162.703	32.4768	123.615	15.12	19.5514	1.67061	1
S168	159.27	34.5592	95.3675	20.0772	13.0239	0.619689	1
S178	163.808	31.0504	117.418	14.012	19.2066	0.660844	1
S186	161.65	30.8756	118.82	14.7332	17.9336	1.44528	1
S196	155.767	35.75	105.207	15.102	19.0084	2.14132	1
S206	158.632	27.5821	103.235	13.8883	24.5969	2.44055	1
S214	153.95	29.3197	108.867	15.8359	18.218	0.678058	1
S222	157.04	30.6892	115.611	14.9633	20.8367	1.75752	1
S230	160.341	29.1809	114.489	15.8966	19.1346	1.9602	1
S136	161.433	35.0781	102.399	15.1346	18.146	1.68712	1
S144	162.582	28.5201	118.79	15.1949	17.8699	1.97685	1
S153	160.573	27.648	143.536	15.7854	19.8901	2.45933	1
S161	160.045	28.2992	113.697	14.0118	25.5516	2.37666	1
S169	157.714	32.2212	115.875	15.2454	19.2389	2.27988	1
S179	159.848	28.684	80.399	14.2139	20.7865	2.11811	1
S187	158.483	27.3669	100.134	15.2985	22.3886	1.41049	1
S197	162.05	33.1673	109.594	14.6343	19.2159	1.52245	1
S207	159.9	29.2094	105.289	15.2107	29.942	1.57069	1
S215	156.435	30.2569	115.322	15.1309	19.9714	2.18674	1
S231	162.11	31.525	102.113	15.2813	15.4358	1.05681	1
S137	160.759	30.563	126.207	14.628	20.7407	2.49976	1
S145	164.04	31.399	107.002	14.3761	17.22	1.72279	1
S154	159.307	28.432	119.547	15.4735	20.561	2.9113	1
S162	158.353	31.8901	106.388	15.3872	17.408	2.05988	1
S180	161.073	25.9505	116.545	13.8374	27.8363	2.38931	1
S188	158.065	30.2068	121.981	16.2789	23.7234	1.09834	1
S198	160.452	30.7892	104.256	15.9893	21.2269	1.39396	1
S216	160.418	30.4155	112.07	15.8431	18.9748	1.73994	1
S224	159.38	28.2208	118.314	14.7832	16.2031	1.99232	1
S232	159.69	30.4219	113.183	15.9081	13.9132	1.81826	1
S138	155.244	33.8473	112.523	14.5954	21.4441	2.44457	1
S146	161.552	30.9292	130.166	14.5713	15.3099	2.27984	1
S155	158.42	33.318	114.698	15.8952	19.7582	1.72548	1
S163	165.034	30.3529	138.382	15.3778	16.5633	1.65891	1
S172	156.819	39.0212	107.371	16.9123	15.5831	2.41652	1
S181	160.176	32.2726	106.087	15.108	15.4431	1.5003	1
S190	160.143	36.6903	103.807	15.7353	18.4834	1.66204	1
S199	157.51	34.4089	94.984	16.9856	15.936	1.88918	1
S209	156.458	27.3949	109.199	15.3453	20.7723	1.9093	1
S217	155.283	28.5697	90.1479	15.8917	17.8868	1.16615	1
S233	159.128	28.3555	108.722	14.6255	20.6906	1.44291	1
S139	161.353	31.1436	118.291	14.7551	17.0318	2.33023	1
S147	162.037	30.8808	137.471	15.2783	17.6546	1.92129	1
S156	158.617	27.066	113.31	14.6532	28.3785	0.862956	1
S164	158.173	33.8416	106.71	15.4185	19.1184	1.97901	1
S173	157.775	40.0961	91.0336	15.8658	13.9696	1.55484	1
S182	162.49	32.744	121	15.6991	16.9513	1.88016	1
S191	160.887	38.0433	100.13	15.4658	18.145	1.7221	1
S200	157.758	32.1208	106.25	15.309	22.4918	1.49956	1
S210	160.626	30.101	138.626	16.1432	12.7905	1.9097	1
S218	152.95	25.6432	102.139	16.2681	20.0107	1.11051	1
S234	156.752	27.1966	112.18	14.6723	18.9559	1.67327	1
S235	160.572	30.6127	99.3584	15.1116	18.3356	1.56681	1
S243	156.043	30.5038	93.1267	15.3264	24.2769	1.59244	1
S251	156.777	28.9302	107.329	15.5892	16.895	1.54259	1
S259	156.812	32.4017	92.2202	15.685	19.5293	1.88971	1
S267	153.773	26.2353	95.1221	15.3616	19.5398	1.4425	1
S275	157.818	25.9222	111.193	14.0854	24.7431	1.99512	1
S291	156.531	27.8912	94.0018	14.6379	30.1276	0.815653	1
S299	156.182	30.4349	105.948	15.1945	22.6957	1.33523	1
S307	155.625	29.3047	102.541	14.8905	20.7528	1.50889	1
S315	161.177	29.83	115.283	15.6401	21.4734	1.77038	1
S323	156.109	29.6648	108.804	14.6905	25.3088	1.87937	1
S244	157.543	31.0146	110.142	15.431	23.1805	1.62704	1
S252	155.42	32.9286	95.932	14.9242	21.1828	1.98202	1
S260	154.336	32.1067	95.4021	15.3481	20.3506	1.68359	1
S268	154.718	29.4937	113.475	14.791	26.9776	2.27433	1
S276	158.365	26.229	113.269	14.2147	20.1768	2.46619	1
S292	156.112	27.0273	95.2459	15.7532	18.9296	0.973623	1
S300	162.689	27.4809	139.639	14.5563	20.0111	1.83713	1
S308	157.885	31.2027	84.5439	15.3951	20.447	1.28701	1
S316	158.04	29.4856	110.163	14.8414	19.6467	1.97569	1
S324	153.73	27.7147	96.213	15.7623	20.2876	1.41686	1
S237	158.019	30.4824	114.785	15.511	17.2454	1.90405	1
S245	158.396	28.7584	94.5782	15.775	18.4989	1.32613	1
S253	154.801	31.47	91.339	15.7662	18.6616	1.08276	1
S269	154.209	27.0928	87.5437	15.66	18.1239	1.04434	1
S293	154.09	28.8235	103.378	15.4912	18.7013	1.45798	1
S301	163.189	27.1948	143.834	15.486	16.7684	1.82253	1
S309	156.708	35.2331	110.003	14.6997	19.2199	2.80953	1
S317	163.989	27.4305	110.354	15.1028	21.8123	1.67228	1
S325	154.074	26.0044	110.599	15.3245	21.644	1.77598	1
S238	163.266	28.3879	116.034	14.979	19.399	1.93105	1
S246	155.042	30.6578	97.9837	15.4465	19.1504	1.35332	1
S254	153.289	29.6948	86.1451	16.2204	18.6748	0.867697	1
S262	153.971	29.3495	87.7961	15.5043	17.4617	1.02094	1
S270	156.65	27.0265	114.37	14.3027	24.7604	2.97586	1
S278	159.901	29.147	125.878	15.8705	18.6725	1.7778	1
S294	154.953	28.3332	90.8882	15.2726	19.3591	1.67228	1
S302	157.324	27.8229	125.553	14.5719	19.6234	1.63349	1
S310	158.828	32.6713	103.225	15.8563	16.3321	1.32781	1
S326	154.966	28.6049	117.244	16.7865	20.9891	1.64476	1
S239	158.546	31.9204	113.712	15.2698	20.3456	1.88803	1
S247	153.296	29.7782	80.0093	15.9417	17.9736	0.931755	1
S255	153.819	27.7007	83.3772	16.3382	21.7455	0.618374	1
S263	154.653	30.7041	77.7267	15.3684	16.4269	0.65604	1
S271	157.952	25.6798	115.12	14.1546	29.5238	2.30627	1
S287	159.907	27.903	147.967	14.7169	17.2415	1.81632	1
S295	160.068	28.2525	112.041	14.9248	22.4243	1.30107	1
S303	163.184	32.2323	106.448	15.4983	18.486	1.39724	1
S311	161.725	33.5908	108.693	16.0073	14.459	2.38259	1
S319	156.033	27.1814	106.618	15.6978	15.4111	2.05124	1
S327	155.599	27.0002	115.208	15.6851	23.5739	1.52805	1
S240	154.895	28.7353	118.722	14.6372	21.9558	1.87456	1
S248	156.804	30.2535	94.5567	14.681	25.2618	1.0244	1
S256	153.149	28.3269	85.2509	16.2438	19.4728	1.01094	1
S264	153.827	31.4288	84.5002	16.3505	17.1626	0.850255	1
S272	157.141	26.0782	105.302	13.7786	29.2007	2.79969	1
S288	155.103	24.5184	82.3138	16.1485	18.8588	0.978054	1
S296	167.954	30.5622	139.849	15.8745	17.6891	1.30541	1
S304	158.801	29.129	108.899	15.873	18.8371	2.17581	1
S312	158.146	28.3388	140.837	15.226	24.2933	1.9235	1
S320	152.171	30.0159	91.825	15.8079	17.3768	0.950603	1
S328	152.028	25.7552	106.907	15.8023	18.988	1.04972	1
S249	152.444	31.008	95.6174	14.8718	20.9089	0.85252	1
S257	154.155	29.0469	95.8531	15.2253	22.0909	1.09093	1
S265	152.531	29.9457	84.6616	16.5219	19.5933	0.610574	1
S273	158.915	25.6039	127.265	14.159	25.9485	2.50503	1
S297	170.744	27.7885	167.237	14.418	22.2271	1.5724	1
S305	155.067	27.159	112.84	15.1618	24.1452	2.22933	1
S313	156.425	25.6684	111.278	14.4141	28.0296	1.59299	1
S321	157.444	28.8178	121.725	15.2366	20.8102	1.95724	1
S329	154.613	28.2467	88.5729	15.2655	17.0222	1.17238	1
S242	157.894	27.2948	112.284	15.2113	22.2573	2.54655	1
S250	160.06	30.8906	78.6455	15.0857	19.5005	1.03373	1
S258	154.305	29.3168	93.4775	16.0184	19.0285	1.10613	1
S266	154.298	30.0713	90.8495	15.0392	20.0756	0.938479	1
S282	155.795	33.4929	115.273	14.8926	18.0985	1.97994	1
S298	162.249	27.8938	135.381	15.3058	20.5318	2.24627	1
S306	158.351	26.9503	118.005	15.0907	29.8086	2.10856	1
S314	159.928	29.9399	117.247	15.0366	19.5626	1.85405	1
S322	154.808	32.5949	115.171	15.6102	20.9214	2.0347	1
S339	158.117	29.3837	118.987	15.583	18.3724	2.66726	1
S347	154.475	29.8975	82.7983	14.7981	19.0342	1.3701	1
S357	153.535	32.4117	117.902	15.5188	17.5725	2.24779	1
S365	155.693	38.4151	115.817	14.5887	17.6045	2.63682	1
S382	158.534	29.7356	134.655	14.9232	18.229	1.94025	1
S398	156.524	30.2535	131.662	15.3537	18.801	1.94031	1
S407	159.642	33.4517	108.03	14.6612	22.0127	2.1268	1
S415	155.433	36.9656	117.039	15.644	19.9525	0.677351	1
S332	156.131	31.8792	105.313	15.2609	22.2882	2.22579	1
S340	158.04	29.4636	127.799	14.4666	21.3457	2.632	1
S348	152.344	29.2951	93.7613	15.0646	18.8606	1.83679	1
S358	159.802	37.5665	124.131	15.4821	16.629	2.73141	1
S366	157.702	38.806	109.494	15.0279	17.6999	1.70354	1
S374	160.558	35.0988	109.055	14.4513	18.6634	2.36287	1
S383	157.15	32.0447	116.474	15.7553	19.0026	2.48847	1
S399	159.48	32.8356	120.583	15.4733	14.0757	2.31608	1
S424	155.021	28.7266	116.49	15.177	23.0161	2.38915	1
S333	155.941	27.053	132.72	16.1805	21.4431	1.99276	1
S350	153.823	28.174	95.417	15.3324	20.8714	1.43802	1
S359	153.708	32.3147	113.776	15.479	19.3013	2.63465	1
S367	156.445	36.0141	116.443	15.1925	17.4634	2.74965	1
S375	157.678	34.3799	103.158	15.1724	14.1778	1.81128	1
S384	156.557	30.7145	114.671	14.4879	19.083	1.37314	1
S392	160.627	31.6378	118.173	14.776	15.6389	2.06547	1
S400	159.332	29.0979	117.534	15.3041	18.0753	1.72252	1
S409	157.012	36.6717	115.031	15.1944	18.3699	2.33444	1
S425	158.882	40.2921	103.733	15.4089	15.6786	2.39971	1
S334	156.85	27.3829	122.531	14.3188	29.2914	2.01264	1
S342	159.111	29.2563	114.703	15.3932	20.3991	2.70501	1
S351	155.156	32.0419	101.12	15.3065	17.5856	1.71095	1
S360	155.615	33.2098	112.291	15.5379	17.4631	2.5992	1
S368	157.716	35.4101	117.616	14.5985	17.537	2.73234	1
S376	157.661	33.2301	99.3413	15.4425	15.9275	2.08942	1
S385	157.477	33.4831	133.136	15.0327	15.5081	1.9581	1
S393	158.857	32.7194	107.068	15.1232	15.1406	1.95669	1
S402	160.668	29.7079	125.761	14.4382	20.025	2.43365	1
S410	169.673	29.9045	138.017	15.1825	15.3083	2.60421	1
S418	158.471	39.2056	109.297	15.9886	14.9033	2.22687	1
S426	160.342	40.4221	111.903	14.5983	17.2185	2.09436	1
S343	152.287	29.8102	92.569	15.2002	22.3035	1.74401	1
S353	153.336	30.1219	93.3819	14.8095	19.4861	1.55184	1
S361	158.024	32.1345	102.117	14.7793	21.7933	2.21823	1
S369	160.113	33.5567	116.639	14.8399	16.0085	1.91113	1
S377	157.234	33.8556	114.572	16.0464	16.8011	1.97839	1
S386	168.482	28.8249	138.478	15.0112	19.1671	1.7369	1
S394	158.614	32.0987	125.104	16.1062	18.195	1.93821	1
S403	161.596	32.6366	130.905	14.6002	14.8952	1.99201	1
S411	154.525	34.673	117.695	15.0744	22.6807	2.61533	1
S344	156.574	33.9869	115.216	15.3424	18.744	2.63438	1
S354	155.43	33.0475	117.905	14.6231	20.565	2.51951	1
S362	154.52	33.2063	139.047	14.4961	22.6457	1.77463	1
S378	157.344	33.3701	108.85	15.3216	19.9849	3.25113	1
S387	158.906	32.7619	103.381	15.398	17.8823	2.30119	1
S395	157.309	33.7147	116.079	15.8883	17.1182	2.17032	1
S412	158.916	33.5291	111.118	14.8332	15.4854	2.43579	1
S420	158.32	31.7532	105.298	15.7448	21.3344	2.09286	1
S428	158.903	32.2554	123.878	14.4053	19.0877	2.82187	1
S337	159.753	28.7047	133.44	14.5986	28.1068	2.37722	1
S345	156.61	35.903	111.022	14.7836	18.9511	2.47286	1
S355	156.67	34.5997	110.756	15.1234	17.7989	2.42126	1
S363	158.59	38.356	101.026	15.2979	17.3723	2.24118	1
S371	159.883	31.49	119.745	14.4811	17.2552	2.39961	1
S379	157.349	32.8919	111.458	15.5629	16.4027	2.18551	1
S396	158.893	35.2946	117.215	15.3835	17.6283	2.29016	1
S405	160.804	30.2245	126.89	15.0439	16.2964	2.38935	1
S413	156.681	36.7364	117.815	14.6726	20.75	2.57659	1
S421	154.449	28.3815	104.312	15.8605	20.3916	1.59587	1
S429	157.401	33.6599	108.124	15.4022	18.8156	2.29754	1
S338	153.028	29.9024	116.7	14.9771	20.9361	2.68015	1
S346	153.142	31.1154	87.6278	16.0097	19.9028	1.10156	1
S356	157.364	38.631	122.628	15.7397	16.5888	2.35118	1
S364	157.31	34.81	123.047	14.7543	22.926	2.73387	1
S372	157.806	35.2781	107.436	16.1592	14.2072	2.6644	1
S380	156.77	35.4809	107.739	15.1904	18.7048	2.15126	1
S389	157.719	33.7487	106.08	15.9551	16.4366	1.7837	1
S397	155.135	33.1985	117.903	15.4021	18.9951	2.12427	1
S406	159.875	31.3263	132.851	15.122	16.8949	2.01401	1
S414	154.338	32.3367	113.248	15.488	20.054	2.07208	1
S430	160.359	37.9362	109.584	15.1061	14.4314	2.63974	1
S431	158.275	42.1602	109.636	16.9322	14.8729	1.60395	1
S432	159.302	37.5451	114.66	15.2494	18.4722	2.09424	1
S433	157.91	34.4828	109.37	15.3098	18.446	2.77841	1
S5	163.721	32.1302	143.183	14.6732	16.7223	0.490604	2
S34	155.249	25.391	123.625	15.441	19.5657	1.32404	2
S50	161.678	27.7514	129.45	15.1755	18.5346	1.59362	2
S58	159.045	27.983	140.653	16.0266	18.9834	1.06258	2
S66	159.17	31.3493	117.344	14.8499	20.7784	1.27769	2
S75	157.282	33.1019	118.805	15.4663	19.7093	1.73776	2
S83	163.761	35.1477	86.8108	16.0499	18.7303	1.10528	2
S108	159.784	33.5017	117.655	15.781	20.0499	1.09785	2
S124	160.439	30.2676	111.453	15.5024	18.7532	1.13774	2
S8	158.092	30.0657	110.984	15.7874	19.2474	1.09691	2
S51	160.931	30.0524	128.898	14.5806	17.6706	1.56403	2
S67	161.075	33.174	127.978	14.6215	20.929	1.06661	2
S76	161.405	34.5165	111.586	15.0326	20.8182	1.18737	2
S93	162.753	31.7586	113.228	15.2721	18.3532	1.39116	2
S101	160.325	30.038	91.3314	15.7624	17.514	0.68513	2
S117	161.27	30.5699	113.975	15.8992	21.6344	1.10136	2
S125	160.031	30.0373	121.633	15.0841	24.3041	1.15987	2
S12	163.74	30.4539	93.4632	15.7416	20.3724	0.847513	2
S41	159.97	30.6932	123.611	14.2741	16.4128	2.08094	2
S52	161.068	31.2124	140.634	15.6956	16.874	1.4449	2
S60	163.295	40.3987	109.665	17.2793	13.0965	0.900729	2
S69	160.923	31.4274	128.466	15.5911	21.4195	1.45295	2
S77	160.466	34.6064	122.78	15.6983	17.6467	1.54702	2
S85	158.089	34.2714	127.805	15.2826	15.8191	1.20659	2
S94	155.669	29.2934	126.123	14.534	18.3487	1.89795	2
S102	157.156	30.446	133.989	15.277	18.4864	1.61325	2
S110	151.225	29.1464	110.223	15.806	18.6814	1.07555	2
S13	160.659	26.1539	117.518	14.0627	23.465	1.57534	2
S43	160.386	24.5426	110.055	15.7163	25.5144	1.00374	2
S53	161.083	28.9379	139.976	15.1535	17.201	1.65718	2
S61	159.285	31.5134	108.981	16.0211	20.797	0.8139	2
S70	158.232	35.3566	110.541	15.2158	18.2555	1.01259	2
S78	160.876	31.5971	105.164	15.6864	19.7903	1.30303	2
S86	156.883	29.2183	125.565	15.4396	18.6782	1.62931	2
S95	159.904	30.4586	115.959	15.6406	18.0849	1.26066	2
S103	155.255	27.3821	96.2041	15.3315	18.739	0.642868	2
S127	159.731	31.6713	118.21	16.3196	21.4758	1.33353	2
S45	158.645	27.6561	123.713	14.2921	22.6027	1.62981	2
S62	161.362	31.6841	104.162	15.7467	19.5376	0.488115	2
S71	159.879	35.7724	115.627	15.0183	17.3817	0.581619	2
S79	162.51	32.1796	96.0372	15.9845	19.0976	1.1391	2
S96	157.515	29.3132	117.227	14.946	22.3132	1.3699	2
S120	160.464	27.3956	102.493	15.1141	27.6227	1.61374	2
S128	161.194	30.4106	115.748	16.0583	17.8591	1.07309	2
S19	158.115	28.1852	131.324	14.1718	24.6623	2.12796	2
S55	157.804	30.4465	115.494	15.1626	19.2109	1.58673	2
S63	162.14	32.7864	109.652	15.728	16.3203	1.0744	2
S72	160.043	36.4063	111.111	15.0422	16.0173	0.712862	2
S80	159.979	34.8842	113.478	15.7093	18.9238	0.926839	2
S97	159.371	29.4331	118.846	15.2982	18.7025	1.65114	2
S129	155.703	34.3109	120.552	15.6812	18.5207	1.00303	2
S30	158.81	27.6975	137.354	15.0808	26.3228	1.3333	2
S47	161.369	30.2098	129.4	15.1166	17.9752	1.48701	2
S56	158.661	29.1697	136.641	15.5137	20.1964	1.53168	2
S64	160.606	33.4499	111.256	15.0636	19.0245	1.44351	2
S90	161.091	34.8043	123.322	15.2722	17.8812	1.51634	2
S98	161.088	31.1042	123.059	15.646	16.9759	1.17369	2
S114	155.07	28.2	128.718	14.1766	26.402	1.56511	2
S122	159.099	28.9236	113.495	15.134	22.1428	1.03679	2
S130	160.038	38.3185	120.587	15.7864	15.1345	1.43486	2
S31	159.706	30.0764	114.278	14.9694	22.8053	1.46794	2
S49	163.078	28.7202	123.895	15.5618	17.4309	1.87558	2
S57	162.4	32.8027	120.561	15.1216	17.4534	1.47343	2
S65	157.971	30.5182	124.839	15.2536	21.1817	1.01809	2
S74	159.586	30.6131	118.269	15.6171	23.838	0.722186	2
S82	164.509	35.9205	83.6898	15.7493	17.751	0.93487	2
S91	159.988	32.3336	110.954	15.5042	19.6019	1.24622	2
S99	158.233	27.2006	132.677	15.2272	23.9293	1.82689	2
S115	160.052	29.0522	127.316	14.7742	23.3291	1.70461	2
S131	159.367	33.4779	119.129	15.3264	18.2895	1.26032	2
S132	159.289	36.6598	120.45	15.313	17.5857	1.53798	2
S140	161.214	32.5838	118.225	15.1243	16.5541	1.16474	2
S148	160.897	28.7448	140.535	15.7381	16.0387	1.24145	2
S157	161.662	32.0621	125.935	15.4682	20.0468	1.32161	2
S165	155.55	28.7298	141.03	14.4807	25.5723	1.79239	2
S174	160.878	34.3928	107.207	16.1141	15.549	1.31362	2
S183	159.065	31.0396	135.563	15.1005	16.8296	1.4455	2
S192	159.652	41.1588	123.046	14.7897	15.4783	1.43197	2
S211	163.675	28.3772	135.616	14.8475	18.9185	0.976124	2
S219	161.182	30.2977	108.942	15.6121	18.6076	0.857053	2
S133	161.232	34.0582	121.142	15.1867	20.0759	1.50024	2
S141	161.349	35.6063	118.015	15.7557	16.5635	1.04777	2
S149	157.782	29.146	140.692	14.9221	19.0104	1.46631	2
S158	161.637	28.1475	133.614	14.3639	18.2261	1.03033	2
S166	160.466	33.5179	119.72	15.5627	14.7395	0.77414	2
S175	162.212	38.0752	113.542	15.1052	13.7048	1.05856	2
S184	160.828	31.8745	133.352	15.3095	17.3577	0.790941	2
S194	158.628	32.5853	109.109	15.3359	17.4653	1.2004	2
S228	158.43	30.307	128.456	14.973	19.0161	1.38841	2
S134	160.997	33.8681	112.562	15.8193	17.7818	1.07963	2
S142	161.688	30.188	119.805	15.6909	20.103	1.10382	2
S150	161.431	33.1294	117.072	15.0359	18.4075	1.87026	2
S159	162.407	33.4346	114.342	17.8959	16.559	0.530924	2
S167	161.5	34.6057	106.227	17.8958	16.8923	0.855587	2
S176	161.554	35.9582	116.382	14.7188	14.9319	1.02231	2
S185	156.163	25.36	123.924	14.4952	23.3127	1.52947	2
S195	162.748	35.4638	109.922	15.113	17.9864	0.956057	2
S205	160.209	26.4725	106.777	15.0218	24.1737	1.55874	2
S213	165.436	30.4227	113.001	15.7397	18.8933	0.226033	2
S221	158.469	31.0653	119.864	14.605	22.5709	1.6129	2
S229	159.22	28.3106	110.967	15.4233	21.893	1.07314	2
S135	158.804	31.4911	137.526	15.2054	18.5729	1.85401	2
S143	161.234	31.0686	121.268	15.0335	16.1857	1.14035	2
S151	160.727	29.4977	117.847	16.8156	22.406	1.75827	2
S160	161.828	32.5744	134.643	14.9195	18.3713	0.61312	2
S168	160.668	32.2707	102.854	20.4969	12.7656	0.203264	2
S178	162.601	31.9744	136.879	15.0984	18.258	0.462565	2
S186	159.87	30.3184	138.522	15.2867	16.7788	1.11677	2
S196	159.794	34.5975	110.126	15.8496	17.9905	0.884508	2
S206	159.2	26.3226	120.176	14.798	23.9865	1.76302	2
S214	157.731	28.063	113.11	15.7999	19.1108	0.739805	2
S222	158.625	28.9787	123.546	15.2823	19.735	1.4052	2
S230	161.421	28.8369	123.667	16.4545	18.0751	1.11985	2
S136	160.404	36.5323	121.114	15.0687	17.0646	1.36351	2
S144	160.715	27.4402	128.819	15.3535	19.3984	1.39653	2
S153	158.033	26.3335	149.726	15.2267	19.9332	1.7777	2
S161	160.306	28.7702	126.087	14.4109	23.3923	1.45951	2
S169	160.111	30.52	113.67	15.0427	20.4958	1.19071	2
S179	163.299	27.3605	87.1814	14.6618	21.2588	1.26095	2
S187	160.035	26.2804	106.676	14.8609	22.0149	0.840481	2
S197	162.275	32.2045	125.364	15.31	19.0037	1.29066	2
S207	161.085	28.5916	111.501	15.5269	26.006	0.948977	2
S215	160.227	31.0778	114.227	15.9281	20.6239	1.55638	2
S231	158.284	27.6963	119.236	14.6221	15.7359	0.883011	2
S137	160.193	30.8724	129.891	15.1796	19.6159	1.75694	2
S145	163.266	31.7594	120.851	15.2736	15.0797	1.52721	2
S154	159.131	27.8001	130.404	16.12	20.2609	1.8708	2
S162	160.732	30.8481	117.201	15.8257	17.0332	1.11958	2
S180	157.713	25.3016	131.799	13.3917	28.6414	1.78583	2
S188	157.253	28.2501	131.327	15.8316	24.5418	0.799766	2
S198	161.277	29.1151	116.37	15.3516	20.3033	1.21502	2
S216	160.444	29.7445	123.927	15.8998	19.1356	1.10352	2
S224	159.561	27.1303	122.13	15.4118	15.6768	1.33526	2
S232	161.074	29.6071	113.868	15.4728	16.2035	0.555814	2
S138	159.497	33.9	116.206	15.0347	18.9927	1.16454	2
S146	161.205	30.4051	133.572	14.5328	14.9992	1.47054	2
S155	158.473	32.4929	125.783	15.4719	20.0334	1.49404	2
S163	164.923	30.7287	144.005	15.9949	16.3901	0.580228	2
S172	159.219	33.8751	107.678	15.1177	16.3357	0.649715	2
S181	163.504	32.7079	104.345	16.0838	14.7413	0.352326	2
S190	159.212	36.459	127.581	15.5076	17.7141	1.11624	2
S199	161.347	32.6754	100.732	17.1838	15.6173	1.29129	2
S209	159.133	26.1323	122.251	14.9186	19.0117	1.14374	2
S217	156.674	27.2127	108.321	16.1937	17.9681	0.661057	2
S233	158.466	28.3412	108.299	15.0124	20.0294	0.901535	2
S139	163.132	31.1184	121.607	15.238	16.7514	1.44815	2
S147	161.034	30.3603	137.26	16.0941	16.31	1.38442	2
S156	156.167	26.3623	123.887	13.647	26.8486	0.90681	2
S164	160.235	31.7754	115.506	15.2703	19.0867	1.03795	2
S173	159.798	39.7675	103.105	15.6505	13.2872	0.904192	2
S182	161.529	31.9877	136.89	16.0236	17.4615	0.957843	2
S191	161.134	38.438	120.585	15.5805	17.5032	1.10136	2
S200	159.751	32.6635	121.971	15.1293	19.9916	1.46419	2
S210	160.099	28.7728	128.152	16.0407	12.6187	1.22888	2
S218	159.166	25.7856	117.209	16.5573	17.7908	0.495589	2
S234	160.624	26.8288	115.611	15.1863	17.3816	0.945412	2
S235	159.541	28.0078	119.773	15.1673	18.1032	1.67509	2
S243	161.396	28.134	105.418	15.4457	20.874	1.14234	2
S251	159.666	28.2664	113.977	15.4061	16.9809	0.862772	2
S259	162.333	31.8415	97.9853	16.1942	18.3068	1.18038	2
S267	158.75	25.7209	103.203	15.3806	18.9597	0.58961	2
S275	156.342	27.014	126.141	14.4482	20.8186	1.80382	2
S291	162.329	27.3331	106.47	15.7695	23.6637	0.941993	2
S299	156.682	27.305	125.061	14.8387	22.3504	0.914798	2
S307	160.6	28.9957	111.727	15.3749	20.8758	0.589037	2
S315	160.924	29.8755	116.725	15.5971	21.1591	0.996314	2
S323	159.045	27.7504	109.368	15.2312	23.9931	0.933436	2
S244	158.294	29.2151	110.245	15.549	23.7251	0.843787	2
S252	160.511	30.7753	105.453	15.7772	19.773	1.06573	2
S260	158.071	31.3397	108.742	15.7493	19.1898	0.481048	2
S268	157.89	27.6139	116.733	15.3217	25.5689	0.928222	2
S276	158.75	27.0723	122.307	14.2739	20.0201	1.51982	2
S292	158.28	25.3508	113.547	16.1714	17.0699	1.00174	2
S300	159.56	27.9917	151.459	14.8202	20.1725	1.24185	2
S308	161.325	30.2912	87.4619	16.0851	18.6687	0.355609	2
S316	158.168	28.5053	115.82	15.4977	20.4862	1.35606	2
S324	157.106	27.0218	102.297	15.8987	20.6015	0.706445	2
S237	159.082	29.573	128.943	15.5777	16.245	1.49194	2
S245	158.851	25.4031	117.153	15.4273	18.5243	1.20909	2
S253	158.354	28.8389	109.525	15.5923	18.2441	0.827542	2
S269	160.783	26.0852	109.14	16.0489	17.2777	0.919469	2
S293	159.18	27.2661	104.344	16.0583	18.6643	0.813052	2
S301	161.253	26.8181	145.912	16.1801	16.5553	1.16265	2
S309	158.287	33.6902	110.76	15.7161	17.5315	1.36791	2
S317	163.856	27.4168	123.446	15.5789	21.0428	1.28432	2
S325	157.189	25.6624	117.355	16.2193	20.9082	0.911768	2
S238	160.829	28.742	131.769	15.3276	17.6872	1.48729	2
S246	158.674	28.9272	103.653	15.3612	17.5976	0.860238	2
S254	156.655	28.1282	93.626	16.553	18.4589	0.230372	2
S262	156.593	26.9261	95.9505	15.4735	17.4586	0.540857	2
S270	157.752	25.3556	130.722	14.3835	24.7731	1.78641	2
S278	158.241	30.0183	140.759	15.7589	17.1238	1.09056	2
S294	159.654	27.1948	97.4467	15.419	18.5174	0.870482	2
S302	156.362	27.2623	140.311	14.3254	19.3529	1.46763	2
S310	160.307	29.8875	115.123	15.4173	16.1683	2.75644	2
S326	157.005	27.8461	124.752	16.2247	19.1884	1.03391	2
S239	157.939	30.0747	134.193	15.622	20.4791	1.52606	2
S247	162.075	29.7078	99.7065	16.0512	18.1091	0.585546	2
S255	163.628	27.9836	90.8239	15.5607	20.89	0.218807	2
S263	160.893	28.0974	90.2507	15.8401	15.6126	0.477635	2
S271	158.009	25.7311	123.681	14.2023	29.626	1.59162	2
S287	160.663	25.7523	126.62	15.4767	18.7067	0.437054	2
S295	158.617	24.769	121.437	15.8087	19.8404	1.37519	2
S303	161.53	31.559	120.875	15.9087	17.7434	1.42882	2
S311	163.483	32.0495	117.144	15.9292	13.3522	1.3169	2
S319	159.537	25.818	119.42	15.521	15.5464	1.14889	2
S327	157.231	26.6713	120.061	15.6499	19.7184	0.908286	2
S240	159.025	28.3477	115.819	14.902	20.6631	0.933794	2
S248	160.838	26.9108	101.011	15.0219	25.5313	0.957151	2
S256	158.967	26.5372	96.4542	15.9484	18.9639	0.391522	2
S264	160.876	28.2836	93.0966	15.9829	16.7469	0.369964	2
S272	157.794	25.4343	123.994	13.7862	28.9166	1.60102	2
S288	158.717	24.0285	80.4986	16.4206	17.5132	0.474002	2
S296	164.209	30.4385	149.4	16.1391	17.5242	1.03162	2
S304	162.618	28.3239	119.856	15.788	17.9441	1.77146	2
S312	158.314	28.773	141.047	15.0433	23.6589	1.38757	2
S320	160.743	27.6217	94.5216	16.3066	15.9995	0.253429	2
S328	157.236	25.5197	111.969	16.6193	17.8829	0.305509	2
S249	156.917	28.6046	106.482	15.8559	19.6531	0.567852	2
S257	157.974	26.5798	110.231	15.5418	20.9581	0.774101	2
S265	160.026	28.0229	96.1868	15.4461	20.1582	0.448592	2
S273	156.814	26.9804	141.103	15.0889	22.4143	1.87162	2
S297	166.798	26.4312	174.771	14.7346	23.1368	1.35759	2
S305	154.982	26.7035	128.392	15.2314	24.0802	1.82271	2
S313	155.639	24.559	125.852	13.8338	28.7217	1.33061	2
S321	157.937	27.5368	138.739	15.7944	20.6648	1.19785	2
S329	161.59	27.4784	89.686	15.7805	15.9288	0.676008	2
S242	160.243	29.3652	118.785	15.0818	18.5191	2.00575	2
S250	161.56	28.9833	93.4205	15.2103	19.5615	1.17943	2
S258	160.164	27.8655	104.15	16.6762	17.4903	0.551716	2
S266	160.356	26.6452	107.914	15.771	18.0725	1.25739	2
S282	157.874	32.9673	117.392	15.3377	17.3461	1.27516	2
S298	162.075	27.4076	136.696	15.0777	20.4293	1.27587	2
S306	154.334	26.5685	123.146	14.3705	29.509	1.90262	2
S314	158.256	29.1064	113.221	15.0613	19.8847	1.41991	2
S322	158.673	30.9285	117.714	15.5127	19.089	0.890003	2
S339	159.476	28.7136	121.007	16.1462	16.61	1.38098	2
S347	158.343	27.8048	95.3401	15.463	18.7157	0.940929	2
S357	155.413	30.6805	121.322	16.5026	16.2504	1.22866	2
S365	159.668	37.6	119.329	15.5404	16.9735	1.5508	2
S382	159.214	29.3891	138.817	15.0982	18.6854	1.35712	2
S398	157.389	30.3974	144.296	15.1521	19.0543	1.55146	2
S407	163.451	32.6119	110.84	14.6571	20.2912	1.3951	2
S415	160.619	34.8569	121.118	15.4252	19.9105	1.24826	2
S332	161.77	31.9134	110.532	15.2612	20.0759	1.13488	2
S340	161.284	28.9031	136.534	14.5505	21.1701	2.1456	2
S348	160.611	27.4315	107.58	15.8912	16.9278	0.764324	2
S358	158.786	36.9314	134.342	15.4534	15.2668	1.66964	2
S366	160.069	36.7992	112.248	15.2926	17.8141	1.09734	2
S374	160.784	34.8365	123.443	14.7502	17.2631	1.05673	2
S383	159.301	31.2084	115.007	16.045	18.82	1.52992	2
S399	160.098	32.3877	129.777	16.2779	13.7296	1.26103	2
S424	157.453	28.8302	122.96	15.2482	22.8187	1.53674	2
S333	156.783	26.8482	135.096	15.1674	21.1635	1.3386	2
S350	160.4	28.5547	101.486	15.9642	18.1495	0.642222	2
S359	156.404	28.8412	120.736	15.9837	18.8473	1.2068	2
S367	159.209	34.0655	116.832	15.5151	17.6371	1.36927	2
S375	162.109	34.4476	108.862	15.3147	13.4806	0.880615	2
S384	160.152	30.9652	123.797	15.3403	17.422	1.26306	2
S392	159.411	30.9877	128.965	15.5829	15.1062	1.48499	2
S400	160.589	30.4009	123.825	15.3896	17.4276	1.53681	2
S409	159.347	35.8029	121.026	15.792	17.6992	1.40367	2
S425	162.463	36.0208	98.9488	15.7581	15.2359	1.30847	2
S334	157.141	26.6109	139.217	14.3718	27.959	1.59996	2
S342	160.519	27.9	117.452	15.9181	20.6129	1.51056	2
S351	159.795	29.5357	103.707	15.9383	17.4829	1.01112	2
S360	159.332	31.8965	119.238	16.03	15.9205	1.34698	2
S368	160.102	34.3553	127.026	15.0777	17.0917	1.94856	2
S376	160.294	34.0651	105.745	15.367	15.8677	1.07256	2
S385	159.779	31.6771	134.454	15.9403	14.6761	1.13228	2
S393	160.661	33.199	121.424	15.6589	14.2004	1.54067	2
S402	161.008	29.5178	134.515	14.7924	19.3518	1.59661	2
S410	168.811	29.3502	141.647	15.554	16.0975	1.80682	2
S418	160.821	36.861	117.606	16.5644	14.4791	1.13371	2
S426	162.196	38.3316	115.016	15.505	16.6817	1.01471	2
S343	157.749	28.6697	101.266	15.1225	21.8	1.25	2
S353	160.858	27.8108	104.63	15.4321	22.2572	0.718654	2
S361	159.781	30.3496	107.052	15.5196	20.3251	1.19001	2
S369	163.528	32.5306	116.383	15.7212	14.9671	1.00882	2
S377	158.392	31.8262	122.206	16.5006	17.11	1.51057	2
S386	167.485	27.471	140.09	15.881	18.6403	1.13946	2
S394	160.17	31.7038	136.103	16.6161	18.4277	1.47481	2
S403	161.744	31.8029	132.702	15.3894	15.0404	1.4409	2
S411	155.918	33.7885	122.972	15.2698	21.0323	1.77417	2
S344	158.807	32.3319	118.524	15.5112	18.2074	1.50414	2
S354	159.759	31.5577	110.093	15.3126	18.6916	1.54456	2
S362	156.61	31.745	139.865	15.2479	23.0971	1.20927	2
S378	159.495	31.6934	116.286	15.4345	19.0413	1.91412	2
S387	159.385	32.4382	112.573	16.373	16.5586	1.52875	2
S395	160.498	33.2033	118.421	16.3484	15.9995	1.03394	2
S412	161.059	31.6483	115.654	15.2072	16.4266	1.23888	2
S420	159.297	30.2567	117.347	16.2929	20.6896	1.61774	2
S428	161.184	31.9234	116.434	14.5768	18.1668	1.8004	2
S337	159.03	28.2907	140.314	14.4502	28.4969	1.73529	2
S345	160.002	33.6807	108.402	15.2204	18.2224	1.59656	2
S355	159.646	33.2178	119.691	15.5331	17.7153	1.73453	2
S363	161.127	35.6726	106.355	15.9623	15.156	1.20161	2
S371	162.139	30.8521	123.29	14.8268	17.1313	1.69019	2
S379	160.019	32.4901	115.784	15.9785	16.082	1.69208	2
S396	160.102	33.3872	124.634	15.4633	17.5921	1.5929	2
S405	160.166	28.3123	129.299	15.3917	16.7769	1.56256	2
S413	156.632	35.1642	130.896	14.8207	19.8354	1.68552	2
S421	160.982	29.7066	111.108	16.2492	18.4603	1.08043	2
S429	161.216	31.8907	109.91	15.7601	18.399	1.06302	2
S338	153.806	28.0751	124.996	15.046	20.1642	1.87496	2
S346	159.794	28.9917	101.089	16.6325	16.9472	0.592455	2
S356	160.038	36.9685	131.832	15.9144	15.5161	1.22633	2
S364	158.667	33.6501	124.346	15.0418	22.0816	1.76455	2
S372	159.832	36.148	113.471	16.6737	13.1581	1.27888	2
S380	158.669	35.0298	110	15.2476	18.2146	0.932538	2
S389	162.103	32.3128	116.34	15.6712	20.1705	1.21801	2
S397	157.982	30.42	124.156	15.6621	18.8298	1.49911	2
S406	160.845	30.8845	128.199	15.5163	16.5159	1.40613	2
S414	159.084	29.6827	110.643	15.6859	19.0653	0.934178	2
S430	163.121	35.4487	108.571	16.2009	13.4985	1.26595	2
S431	162.971	37.5724	107.855	17.7994	15.8526	0.810636	2
S432	162.756	38.16	118.851	15.9768	16.9074	1.24679	2
S433	162.437	32.4785	113.87	15.1473	17.4683	1.36799	2
S5	164.987	29.8557	92.6888	15.4171	16.3624	0.658923	3
S34	154.358	26.043	62.1557	15.7083	19.1881	0.610869	3
S50	163.948	24.5313	66.3035	14.648	20.7516	0.620162	3
S58	159.726	26.3651	68.9838	15.192	21.8286	0.78614	3
S66	155.196	31.5443	63.7971	15.5803	20.3595	0.966433	3
S75	159.36	30.7785	62.9743	16.292	19.7631	0.540854	3
S83	155.995	33.1521	54.3864	15.3254	21.7624	0.345248	3
S108	155.231	33.7027	61.541	15.9003	20.7733	1.04853	3
S124	151.032	31.0713	62.6136	15.849	20.1402	0.611302	3
S8	155.393	30.9279	56.948	16.4244	20.6769	0.628732	3
S51	161.289	28.7512	71.9958	15.5318	20.6638	0.549157	3
S67	160.28	30.9105	57.0526	14.9197	20.9141	0.665325	3
S76	156.014	33.6341	52.2068	15.8657	21.7323	0.75735	3
S93	157.061	33.6199	59.7661	16.0599	19.0768	0.687444	3
S101	150.81	29.7148	57.8009	15.7614	20.5133	0.609303	3
S117	155.829	29.7384	56.3538	16.5717	21.7894	0.396064	3
S125	159.724	29.1665	70.5513	15.7736	25.065	0.765017	3
S12	155.437	28.2954	60.7651	15.8277	24.3108	0.60212	3
S41	161.816	28.4757	61.5477	15.2029	17.0409	0.718432	3
S52	161.534	28.8858	75.3886	15.7419	19.0393	0.911312	3
S60	158.568	35.4194	53.764	17.7227	15.6126	0.372094	3
S69	159.286	28.5076	62.0209	15.9761	22.5263	0.728524	3
S77	159.124	34.0237	51.8388	16.4201	18.0083	0.615374	3
S85	157.661	32.6208	59.8366	16.4073	17.2964	0.548625	3
S94	156.052	29.8457	73.8278	15.6502	18.2907	0.827273	3
S102	158.578	29.0887	73.6828	15.6124	19.5268	0.823408	3
S110	148.775	29.2012	58.3028	15.2357	19.9529	0.806117	3
S13	155.268	27.4527	67.7919	15.3681	23.9596	0.564546	3
S43	154.056	24.1152	68.6625	15.2522	26.2259	0.709788	3
S53	161.43	28.1643	64.98	15.5383	17.9728	0.796095	3
S61	154	30.0646	65.4826	15.9458	23.6276	0.65326	3
S70	154.019	33.006	57.7712	16.1136	19.7941	0.62932	3
S78	153.735	32.1832	60.2026	16.1611	20.1267	0.859617	3
S86	155.977	30.2182	64.8801	16.2238	18.7809	0.729519	3
S95	155.697	30.7222	57.5745	16.0789	20.3494	0.561273	3
S103	148.388	26.7203	56.192	15.0043	22.9115	0.571197	3
S127	156.228	32.8693	69.4045	16.8459	20.5205	0.714192	3
S45	159.945	26.6501	62.3446	15.2115	22.2434	0.673343	3
S62	152.566	32.1066	57.3595	16.3753	20.7693	0.599631	3
S71	153.065	33.8132	57.3873	15.7194	19.8974	0.596496	3
S79	152.745	32.9263	54.0653	16.5162	20.5841	0.760347	3
S96	155.075	30.1946	54.8052	16.1469	19.4849	0.684159	3
S120	152.001	27.0005	58.4987	14.7526	27.5555	0.63201	3
S128	157.47	28.8183	56.7759	15.8299	18.7036	0.600575	3
S19	159.443	25.8583	59.9934	14.9299	25.3407	0.916038	3
S55	158.343	29.777	62.8593	15.5892	18.8211	0.605596	3
S63	154.462	34.4498	59.5853	16.6199	17.3528	0.544787	3
S72	156.761	34.7083	62.262	15.8951	18.561	0.858194	3
S80	157.035	29.8247	69.8794	16.3127	19.1363	0.743769	3
S97	157.835	29.1476	61.443	15.0199	19.7893	0.87931	3
S129	158.137	33.0345	59.2739	16.6304	18.8951	0.450598	3
S30	159.711	27.1788	49.5626	15.8461	26.7144	0.46347	3
S47	161.34	28.4146	60.166	16.167	19.4384	0.593838	3
S56	160.271	26.8028	67.3611	16.0034	21.5358	0.700605	3
S64	156.949	34.512	63.2796	16.2356	20.6532	0.950828	3
S90	158.459	34.163	61.1563	16.5734	18.7006	0.750186	3
S98	159.374	28.7877	66.5297	16.6284	18.9709	0.687425	3
S114	154.96	27.4701	69.1307	14.9119	27.5277	0.916765	3
S122	150.61	27.3783	56.5063	15.4474	22.8595	0.440421	3
S130	157.961	36.8806	67.2401	16.7927	16.7288	0.490195	3
S31	159.117	28.2014	60.3469	15.2537	23.2771	0.668384	3
S49	163.181	26.9412	67.0729	15.6557	20.1837	0.878713	3
S57	159.88	31.8062	56.0935	15.9399	21.5499	0.611303	3
S65	158.763	29.8987	66.6529	15.8828	21.0316	0.534581	3
S74	155.03	31.443	63.6325	16.1163	23.0227	0.607405	3
S82	157.145	32.4288	57.6813	15.2242	21.7644	0.602959	3
S91	153.476	32.4483	65.4849	15.7076	19.6861	0.849653	3
S99	160.201	26.2558	68.881	15.207	25.0576	0.525207	3
S115	155.148	30.2253	60.8429	15.5866	23.6591	0.678004	3
S131	157.474	33.5838	61.4406	16.1418	20.2223	0.685001	3
S132	158.037	35.7528	78.728	16.5526	19.9827	0.748265	3
S140	157.013	31.919	60.8124	15.5111	19.9094	0.443237	3
S148	160.391	27.6349	70.8111	15.8068	17.7661	0.725042	3
S157	160.305	28.9107	67.3752	15.7866	20.8349	0.636616	3
S165	159.845	28.0705	73.0618	14.8324	26.1746	1.14275	3
S174	158.594	30.752	62.7508	16.8579	16.928	0.436709	3
S183	162.156	28.5042	69.7511	16.06	17.1413	0.629872	3
S192	160.402	35.1345	68.9055	16.1915	18.1278	0.384665	3
S211	161.963	26.749	67.4392	15.5377	20.0565	0.628034	3
S219	158.394	29.1252	66.5856	16.6697	21.4845	0.759057	3
S133	157.409	34.1945	59.3915	15.7775	19.9501	0.682991	3
S141	155.965	33.5208	64.4389	16.0399	18.6981	0.413209	3
S149	159.04	28.2918	64.5351	15.6492	18.8971	0.536818	3
S158	161.799	27.4305	69.2926	15.1262	18.9199	0.816562	3
S166	159.091	31.1051	66.5936	15.8903	17.5814	0.52252	3
S175	158.346	36.0989	63.398	17.5507	15.8189	0.474271	3
S184	162.137	29.1385	64.9054	15.5295	18.0352	0.575812	3
S194	155.354	33.8887	62.0304	16.3226	19.4457	0.802601	3
S228	160.008	28.5208	76.2771	15.1161	20.4587	0.883303	3
S134	154.47	33.2132	65.883	16.1674	19.2148	0.675832	3
S142	155.533	30.1553	56.9332	15.7448	21.8694	0.564892	3
S150	158.055	30.9094	62.1923	16.2379	19.0266	0.655425	3
S159	159.059	31.9484	67.5221	17.2059	20.6143	0.47305	3
S167	158.35	36.5251	53.7504	18.9109	13.7815	0.0926264	3
S176	159.433	37.221	60.1931	15.9864	16.6837	0.92842	3
S185	154.537	25.363	61.7989	14.6151	25.3619	0.791157	3
S195	158.511	33.9596	67.0591	15.4092	19.4144	0.600365	3
S205	151.696	25.2874	54.8658	14.6456	26.7286	0.854752	3
S213	159.024	28.7786	64.466	16.0487	20.0858	0.683987	3
S221	159.715	28.6116	59.0658	15.0372	24.9578	0.93646	3
S229	149.192	28.0728	59.5503	14.7712	24.4893	0.58114	3
S135	159.18	28.6038	58.7199	15.679	21.0464	0.481567	3
S143	158.613	29.491	66.6348	14.9636	18.1781	0.671466	3
S151	157.889	28.9499	72.8847	16.4674	23.0294	0.723384	3
S160	162.015	28.8325	68.9258	15.4807	19.904	0.552775	3
S168	155.943	34.1149	62.372	19.9829	14.4254	0.228061	3
S178	163.624	27.457	76.8063	14.5172	21.828	0.903706	3
S186	159.475	28.6272	57.2811	16.0559	18.7093	0.367992	3
S196	155.691	35.3207	57.502	16.1786	18.6922	0.71337	3
S206	159.507	25.7558	51.9074	15.8159	22.9628	0.201138	3
S214	151.047	29.6634	62.3008	15.4744	20.5596	0.901254	3
S222	156.09	29.5763	58.3122	15.2006	20.6821	0.772385	3
S230	159.264	27.4901	61.0539	16.1287	19.9236	0.63035	3
S136	159.31	30.9181	66.5983	15.4886	20.3767	0.61814	3
S144	161.38	26.3627	70.3852	15.1185	17.4775	0.906181	3
S153	163.341	24.8213	83.6413	16.1059	21.8153	1.00858	3
S161	159.976	28.223	56.0058	14.8231	23.6861	0.776895	3
S169	156.757	31.4136	60.8528	15.6655	18.9424	0.925826	3
S179	150.006	27.5198	43.4143	14.1592	22.4407	0.585187	3
S187	153.939	26.0021	56.4137	15.5262	24.5167	0.616295	3
S197	160.273	31.6064	58.5619	16.4413	21.4833	0.948253	3
S207	156.945	27.3829	62.3873	14.832	28.12	0.766687	3
S215	157.812	30.5217	62.1409	15.7201	20.2388	0.896458	3
S231	160.396	29.5728	65.5588	16.13	16.8874	0.264648	3
S137	162.091	27.5815	56.6032	15.8486	22.0208	0.616898	3
S145	161.368	30.2622	59.7267	16.2584	18.0314	0.646145	3
S154	159.248	28.6165	66.134	16.4143	19.7078	1.03939	3
S162	155.242	29.8998	64.2968	16.1057	21.0783	0.766349	3
S180	159.712	23.0795	58.5553	14.7191	28.7175	0.535882	3
S188	158.465	28.4639	71.843	16.6203	19.7815	1.11633	3
S198	157.975	29.1675	60.9803	15.7419	22.102	0.487061	3
S216	157.426	29.1072	59.7221	16.7851	20.4043	0.663386	3
S224	160.122	26.0698	60.4222	16.448	15.7953	0.597211	3
S232	159.303	27.9005	57.0327	15.8845	17.2828	0.275334	3
S138	157.109	32.357	59.1034	15.6737	21.037	0.766911	3
S146	163.772	26.6867	75.2979	15.7397	17.8996	0.60531	3
S155	161.606	31.8557	62.3687	16.4937	22.0025	0.575515	3
S163	166.694	30.5547	81.4639	16.0367	16.4656	0.693127	3
S172	156.073	33.968	61.6732	16.3085	17.1792	0.582128	3
S181	160.368	30.2083	63.8995	15.8695	17.432	0.4005	3
S190	158.814	32.6173	60.1628	16.0261	19.6829	0.64178	3
S199	151.504	31.0936	53.7052	17.1103	18.3976	0.552948	3
S209	158.867	26.4347	65.5768	15.9033	19.2384	0.445442	3
S217	152.126	26.2843	56.8017	16.1552	19.8966	0.340915	3
S233	158.874	26.9836	69.7658	15.6615	17.9202	0.701046	3
S139	164.206	30.1968	57.5274	16.7145	18.2392	0.673827	3
S147	162.147	26.7166	66.0446	16.0945	19.1753	0.509671	3
S156	158.693	24.4407	65.2419	14.9723	26.2657	0.795115	3
S164	155.989	32.2259	64.0495	15.9848	21.444	0.76466	3
S173	157.883	35.1003	66.9279	16.5603	16.3632	0.4984	3
S182	163.363	29.5542	73.4254	16.1471	18.4459	0.883909	3
S191	159.4	34.9316	56.5048	17.2446	20.0965	0.601684	3
S200	157.588	29.867	55.4738	16.2917	21.8504	0.735618	3
S210	161.202	27.5199	64.3066	16.3974	14.0961	0.485678	3
S218	153.72	26.3577	54.2526	16.545	20.3799	0.313526	3
S234	158.357	26.5614	65.6691	15.51	18.4915	0.753782	3
S235	156.872	27.0151	54.6114	15.667	21.5596	0.364737	3
S243	152.529	29.2102	56.5389	15.203	21.4156	0.488992	3
S251	155.469	28.2537	61.0663	16.1392	19.0534	0.6411	3
S259	149.644	29.8688	55.4475	16.365	20.7758	0.892871	3
S267	150.368	26.6625	57.42	14.9927	21.0815	0.710313	3
S275	156.028	26.0922	58.8875	15.1418	23.6962	0.53215	3
S291	154.019	28.797	56.9508	15.4159	27.2688	0.453968	3
S299	156.592	27.0472	68.6503	15.6954	22.5316	0.721238	3
S307	153.594	28.7855	54.1256	15.4329	20.9911	0.746811	3
S315	160.73	26.4868	71.0972	16.4001	24.2127	0.596462	3
S323	153.372	26.6536	58.018	15.8957	24.6825	0.492885	3
S244	155.853	28.0222	59.1099	16.1	23.3371	0.579705	3
S252	152.162	29.6751	58.3126	15.5184	23.1774	0.777539	3
S260	151.652	31.1481	64.0252	15.6605	20.6281	0.900441	3
S268	152.318	27.4281	56.147	16.0082	25.5582	0.475233	3
S276	157.689	26.5202	55.1181	15.7525	20.5276	0.562734	3
S292	156.545	25.6001	54.1981	16.5035	18.3243	0.281852	3
S300	161.841	26.4469	77.8475	15.6335	20.8085	0.636851	3
S308	150.481	27.7567	56.2936	15.687	21.8223	0.619814	3
S316	157.891	27.3207	58.7	15.4354	20.5949	0.706416	3
S324	148.019	26.4779	49.5154	16.386	21.1845	0.486016	3
S237	159.123	27.5204	64.7069	15.5042	17.61	0.464049	3
S245	155.953	27.673	55.6849	15.3497	20.8758	0.182665	3
S253	152.746	29.4492	68.5281	16.0304	19.3703	0.880253	3
S269	153.256	27.9382	61.2787	15.9338	20.3095	0.404357	3
S293	149.331	26.4668	54.804	16.4467	20.8783	0.598618	3
S301	162.367	27.7425	69.6447	15.6848	19.5942	0.563225	3
S309	154.082	34.723	54.7793	15.9614	19.429	0.627699	3
S317	162.219	25.0292	67.8524	14.8857	23.2894	0.795011	3
S325	152.631	25.7211	59.028	15.9217	22.6533	0.733341	3
S238	162.559	26.2374	64.7356	15.5827	21.1838	0.896807	3
S246	151.464	26.7791	53.3749	16.2769	20.6221	0.46583	3
S254	146.659	27.2536	38.1424	15.4909	19.112	0.294371	3
S262	145.845	27.6701	51.9356	16.3491	17.8539	0.525254	3
S270	155.197	26.6864	61.0733	15.2439	23.9125	0.678658	3
S278	161.343	29.0766	74.912	16.4711	18.5358	0.474365	3
S294	148.491	25.2783	58.8382	16.0257	22.0958	0.547612	3
S302	157.752	27.3058	79.5652	15.1172	21.2738	0.814356	3
S310	157.581	30.3414	54.4029	15.7681	17.7339	0.501467	3
S326	158.485	28.4268	68.2224	15.5726	19.6781	0.754764	3
S239	156.134	29.256	59.1268	16.0764	21.9432	0.807691	3
S247	144.752	27.7569	57.4043	15.4406	19.4693	0.783139	3
S255	144.908	29.3711	54.8879	15.4169	21.1052	0.689007	3
S263	147.289	29.3291	50.4642	15.4525	16.8085	0.650368	3
S271	157.449	25.8004	65.9732	14.7896	27.6758	1.08613	3
S287	166.994	26.7295	72.4835	15.4931	19.0241	0.741879	3
S295	159.929	25.3905	48.4613	15.1351	23.7429	0.289647	3
S303	158.989	28.6891	61.1273	16.9971	19.8665	0.394341	3
S311	159.537	30.3866	60.6727	16.0696	14.8693	0.72095	3
S319	154.166	26.3871	64.1778	16.0875	16.8206	0.555619	3
S327	157.507	26.6873	64.5811	15.6054	25.6028	0.677869	3
S240	158.978	26.1112	58.6598	15.7263	20.0186	0.388888	3
S248	150.284	25.5267	58.6504	15.127	29.2161	0.760384	3
S256	147.385	28.9098	61.7363	14.8281	20.4563	0.968117	3
S264	147.126	29.4775	59.2773	16.1528	19.0384	0.604902	3
S272	154.003	25.8949	54.5467	14.1735	29.0062	0.609501	3
S288	147.903	24.9764	56.588	15.8105	20.9297	0.474727	3
S296	166.488	28.035	76.2413	16.0764	21.5249	0.653594	3
S304	158.724	27.6089	61.7337	16.4899	19.4043	0.932742	3
S312	162.233	26.785	61.6023	15.2492	24.2527	0.639327	3
S320	147.685	28.063	57.166	15.4073	18.763	0.557196	3
S328	157.156	26.6197	59.5104	16.3126	19.0637	0.491619	3
S249	148.598	30.5818	52.5761	15.6471	21.3429	0.366236	3
S257	149.256	26.9222	55.0984	15.1986	21.4227	0.533229	3
S265	144.581	25.4183	42.1799	15.5002	22.7927	0.319407	3
S273	160.101	24.3864	66.048	14.5076	25.7209	1.01757	3
S297	168.06	26.7233	78.8707	15.3337	22.5427	0.452173	3
S305	155.989	25.2727	54.7823	15.7325	23.95	0.528743	3
S313	159.143	24.0749	59.9742	14.5514	29.2427	0.478826	3
S321	159.355	26.1215	64.6732	16.2079	22.5704	0.711136	3
S329	148.816	25.9439	41.6752	15.6639	19.1733	0.335008	3
S242	159.412	26.5389	58.8435	15.3288	22.1142	0.701357	3
S250	152.059	26.8608	47.9864	15.5862	25.1901	0.621974	3
S258	148.391	26.878	50.3814	16.2775	20.2879	0.453485	3
S266	156.606	28.5941	41.0065	15.7772	20.4259	0.198352	3
S282	156.621	31.138	50.9954	16.4087	20.2007	0.455669	3
S298	163.14	27.0247	76.4204	14.6355	21.5951	0.896135	3
S306	156.909	24.2806	73.3325	15.6773	26.3854	0.926623	3
S314	153.124	28.5947	53.2644	15.5607	21.2852	0.647576	3
S322	152.276	32.2353	55.2584	16.4416	21.5859	0.466202	3
S339	158.042	26.7463	75.1073	15.9819	18.5957	0.833045	3
S347	149.158	28.1653	52.2967	15.3513	19.8979	0.84563	3
S357	153.369	30.4912	71.1866	16.1352	20.2168	0.804658	3
S365	155.841	36.0993	58.1379	16.2776	18.3371	0.674899	3
S382	158.714	28.8068	68.2398	16.0936	20.1699	0.615494	3
S398	160.235	29.1485	68.3433	15.357	19.7666	0.663727	3
S407	158.506	31.8704	65.4145	15.2894	23.2969	0.669714	3
S415	157.865	33.6364	65.3468	16.1773	21.6582	0.653749	3
S332	159.035	30.491	66.0657	16.2836	20.5681	0.663875	3
S340	159.876	27.9827	67.311	14.9663	20.9817	0.910481	3
S348	148.879	28.8822	55.6109	16.1844	19.5348	0.826356	3
S358	161.204	36.6201	64.7017	17.1673	16.8359	0.594483	3
S366	157.709	34.2183	56.4008	16.2181	17.2146	0.440502	3
S374	160.218	33.0161	67.6327	15.8284	18.9714	0.706478	3
S383	158.415	30.4227	61.6741	16.2622	19.7195	0.657102	3
S399	161.072	30.7365	60.7569	16.5137	15.0928	0.619952	3
S424	154.216	27.7112	62.427	15.7012	24.1884	0.712525	3
S333	160.002	27.1136	68.0125	15.1467	21.8631	0.808138	3
S350	148.506	28.8733	55.8284	15.5371	19.1567	0.739712	3
S359	157.07	28.7182	55.4228	15.9434	18.9352	0.40706	3
S367	159.549	32.9563	47.6016	16.5922	16.7405	0.476412	3
S375	154.556	32.0855	53.1756	17.1763	15.6683	0.531885	3
S384	156.711	28.1746	65.7335	15.2833	19.9915	0.663702	3
S392	160.9	29.9596	65.0382	15.5791	16.7814	0.714793	3
S400	159.861	27.2794	64.3065	15.6879	19.1614	0.717896	3
S409	158.193	36.3768	65.8353	16.27	19.0136	0.877258	3
S425	155.421	36.4348	53.4304	15.7769	17.2328	0.449344	3
S334	160	25.165	69.2591	14.8123	27.5165	0.722013	3
S342	158.19	28.2946	57.8366	16.8267	20.131	0.492454	3
S351	151.977	30.815	60.9843	15.553	19.562	0.717918	3
S360	155.559	31.3407	62.2435	15.9953	19.6199	0.70739	3
S368	159.977	33.3188	60.8054	15.6419	17.7088	0.726729	3
S376	155.12	31.2841	65.4461	16.6004	17.9569	0.906631	3
S385	159.432	29.3259	60.2438	16.4765	17.0548	0.563801	3
S393	157.16	30.6486	54.506	15.955	17.1315	0.524633	3
S402	160.019	26.4321	65.3668	15.4819	21.7733	0.79807	3
S410	169.158	27.7587	76.7131	16.589	17.4751	1.08056	3
S418	157.662	34.0153	56.2069	17.1235	16.8802	0.514027	3
S426	162.385	37.429	62.629	16.4633	18.4865	0.660937	3
S343	149.193	28.6447	50.7738	14.4767	23.0789	0.876002	3
S353	149.469	28.7195	57.535	15.7594	21.4592	0.693124	3
S361	155.938	30.2906	60.7729	16.1582	19.6013	0.586009	3
S369	161.567	29.3542	61.882	16.344	17.7637	0.661409	3
S377	156.665	30.0899	73.076	16.2604	17.5576	0.786741	3
S386	169.175	27.0072	74.7416	16.8869	19.0722	0.945516	3
S394	160.386	29.8953	67.4994	16.2813	19.5522	1.02906	3
S403	161.339	30.4748	64.8911	15.3112	15.7939	0.740057	3
S411	153.91	32.8392	57.8323	16.5089	21.907	0.732575	3
S344	153.885	32.2498	63.4946	16.5326	19.2128	0.757755	3
S354	155.334	30.014	55.3048	15.5715	19.8668	0.802701	3
S362	158.444	29.1563	68.2135	16.1634	24.2059	0.644872	3
S378	158.032	31.4954	62.2163	16.4202	20.4007	1.02134	3
S387	157.336	30.7706	59.7013	16.5931	19.3535	0.607359	3
S395	159.569	27.289	58.9039	16.3644	20.7591	0.168413	3
S412	158.035	32.3735	67.6682	16.4592	17.9102	0.774325	3
S420	156.073	29.5949	58.977	16.6403	22.4107	0.721999	3
S428	157.002	29.4243	68.9885	14.675	20.6429	0.782242	3
S337	159.859	26.2023	76.4291	14.4606	28.8758	1.17285	3
S345	155.963	34.0948	55.4277	16.0965	19.4637	0.784739	3
S355	155.861	33.947	57.9748	16.2593	18.7345	0.594775	3
S363	158.992	34.819	63.8259	16.6447	18.6841	0.464873	3
S371	163.749	29.4478	61.7573	16.0201	18.6261	0.56008	3
S379	157.087	29.8627	54.0436	17.305	16.3545	0.669486	3
S396	159.472	31.7791	61.5988	16.4667	19.1462	0.533751	3
S405	160.564	28.1894	63.9488	15.9135	17.6761	0.791212	3
S413	159.278	32.2161	77.9493	15.1996	20.6579	1.00523	3
S421	157.011	28.8733	52.4019	17.0937	22.9944	0.878486	3
S429	156.378	30.9496	67.3171	15.7395	20.2602	0.858376	3
S338	156.668	28.1634	71.0673	15.6557	18.9359	0.745358	3
S346	147.056	28.5122	54.1989	15.6585	19.5528	1.04158	3
S356	161.104	36.6026	71.0978	16.6399	16.4892	0.687082	3
S364	158.391	31.3212	47.1724	15.6451	22.0198	0.554817	3
S372	158.762	32.8267	62.4747	17.1329	14.2765	0.506308	3
S380	154.435	32.6935	60.8832	16.0116	19.5654	0.848926	3
S389	157.261	31.6491	61.6746	16.7878	18.2022	0.377374	3
S397	158.314	30.2993	70.5405	16.2528	18.8543	0.711278	3
S406	162.624	29.0427	69.3857	15.1472	18.0402	0.799031	3
S414	151.896	31.714	56.4581	16.1532	20.2699	0.889453	3
S430	158.122	35.8867	57.4133	16.0712	13.8608	0.705483	3
S431	158.043	34.9771	60.6778	17.3071	17.9432	0.391948	3
S432	160.104	34.5823	65.0859	16.1165	19.292	0.784958	3
S433	156.849	33.3172	54.4172	16.3383	18.7841	0.738566	3
S5	165.585	30.3459	79.4935	14.7537	17.9017	0.629354	4
S34	157.132	24.9783	65.9299	14.6126	19.171	0.605141	4
S50	163.362	25.7871	61.4806	13.7666	22.3268	0.996682	4
S58	160.7	25.8588	57.5436	14.5816	21.534	0.605962	4
S66	154.321	29.4156	61.1945	14.9175	22.2989	0.938951	4
S75	159.661	29.7668	63.0917	15.9164	21.6255	0.744016	4
S83	157.03	32.7192	48.9134	15.1392	21.5081	0.78929	4
S108	152.845	33.4834	57.7237	15.8167	21.8811	0.899398	4
S124	152.113	27.1733	51.8466	14.936	20.4771	0.642178	4
S8	156.871	30.4136	61.2605	15.5259	19.6429	0.664323	4
S51	160.7	29.2137	65.0891	15.1898	20.8879	0.570414	4
S67	161.417	30.5191	52.0448	14.251	22.167	0.57592	4
S76	155.47	32.9222	58.1154	15.0184	21.7031	0.964347	4
S93	159.346	33.254	54.7186	15.3508	19.427	0.903681	4
S101	151.585	29.8068	49.8688	14.8258	20.5722	0.676366	4
S117	155.85	29.0229	51.0842	15.6017	22.1291	0.570415	4
S125	160.554	29.5464	68.826	14.5782	25.0922	0.82711	4
S12	159.301	25.7974	56.143	14.3185	24.3161	0.845256	4
S41	162.303	28.431	68.0493	13.8467	17.6093	0.760237	4
S52	163.75	29.2445	64.3257	14.8404	18.6375	0.835934	4
S60	159.653	38.5348	54.1925	17.0377	16.0626	0.595171	4
S69	159.387	28.4612	58.902	15.1669	22.2944	0.852356	4
S77	161.144	33.9078	65.7376	14.8528	19.3686	1.18793	4
S85	159.118	33.0613	61.3098	14.7941	18.4062	0.691185	4
S94	156.964	29.8854	59.3715	15.1561	18.9807	0.704784	4
S102	160.043	29.4402	60.4854	15.1319	18.3071	0.723313	4
S110	151.033	29.9329	51.1408	15.267	20.2918	0.485895	4
S13	155.601	26.6278	60.8392	15.0777	24.1141	0.586473	4
S43	152.758	24.0436	60.8065	14.8981	26.6804	0.680873	4
S53	163.27	27.185	68.1232	14.5127	19.5691	0.842451	4
S61	153.059	28.4262	58.1921	14.9423	25.3047	0.696577	4
S70	154.242	33.9758	56.6475	15.5261	20.0402	0.827545	4
S78	155.142	31.542	52.5827	15.7315	20.7819	0.80243	4
S86	158.21	29.2351	66.9366	15.5366	19.9658	0.771452	4
S95	155.369	29.3561	56.8703	15.5192	20.8274	0.550963	4
S103	149.369	26.5566	44.2524	14.335	22.3647	0.664243	4
S127	157.102	31.7469	52.5528	16.5802	21.8828	0.583718	4
S45	161.748	25.7762	60.0492	13.7265	23.8773	0.928273	4
S62	152.747	32.1955	52.111	15.9361	20.563	0.720494	4
S71	155.426	32.5574	50.8875	15.4106	19.9599	0.763443	4
S79	153.18	33.6161	50.4602	15.4137	20.9795	0.780149	4
S96	158.079	29.7178	60.4063	14.7242	20.2965	1.20604	4
S120	152.425	27.4892	55.5104	13.801	27.2439	0.709632	4
S128	159.352	28.033	65.4581	14.9351	19.7535	0.611333	4
S19	160.449	25.8056	60.2548	13.4806	27.3856	0.948725	4
S55	159.067	29.2568	53.9454	14.9018	21.7218	0.85221	4
S63	156.969	34.8008	56.8415	16.0613	18.6472	0.807776	4
S72	155.173	32.684	53.5219	15.8651	19.5665	0.775925	4
S80	158.397	29.4426	58.767	15.1139	19.6242	0.848747	4
S97	159.394	28.4364	54.9362	15.4686	19.3219	0.985455	4
S129	158.641	33.4838	61.2086	16.1449	19.675	0.686086	4
S30	159.992	26.6521	70.6761	14.4295	26.2876	0.683053	4
S47	163.135	27.541	59.2905	14.5509	20.4581	0.693216	4
S56	160.592	26.9683	56.8487	15.0172	20.954	0.413579	4
S64	157.47	33.3989	53.9046	15.8287	20.3827	0.924412	4
S90	159.655	33.1273	58.9138	15.5175	19.6924	0.824953	4
S98	159.793	28.2346	63.307	15.756	20.1213	0.660952	4
S114	154.079	28.6718	65.7687	14.7984	25.9566	0.781696	4
S122	150.898	27.3956	58.9049	14.8802	25.0204	0.477246	4
S130	160.063	36.3766	58.8045	16.3937	17.6998	0.68516	4
S31	159.02	28.1913	55.5577	14.9947	23.4715	0.563905	4
S49	163.429	27.3132	65.699	14.2649	19.744	1.06324	4
S57	158.506	31.3008	58.428	14.739	22.4367	0.665177	4
S65	159.661	29.4829	62.9127	15.2732	21.3614	0.651048	4
S74	155.962	31.5762	64.279	15.4541	22.802	0.872608	4
S82	158.321	33.641	56.2618	15.5737	22.2069	0.827697	4
S91	154.853	31.9862	64.9136	15.5266	19.4594	0.885052	4
S99	160.301	25.2397	62.4707	15.1257	26.5235	0.608759	4
S115	152.847	30.8271	61.3693	14.6731	23.7893	0.864912	4
S131	159.185	33.3516	64.5145	15.5129	19.804	0.75515	4
S132	159.048	35.7865	54.8638	15.9429	20.6431	0.803498	4
S140	157.839	32.3367	57.8055	15.2586	19.3802	0.615017	4
S148	161.652	27.6417	54.3016	15.2365	17.1699	0.662564	4
S157	161.101	29.1042	62.255	14.6279	21.8265	0.86196	4
S165	160.782	26.6778	61.3406	13.8892	27.6042	0.696568	4
S174	159.514	30.7561	57.7976	15.6812	18.8369	0.807745	4
S183	161.62	27.7285	61.7093	15.6484	18.5501	0.682066	4
S192	161.894	37.6577	69.0449	16.4867	18.8774	0.707008	4
S211	163.017	25.6976	59.5574	13.3241	19.7878	0.782814	4
S219	158.911	27.6057	62.0615	15.1564	22.7966	0.7099	4
S133	158.765	32.8451	52.0884	15.979	19.7711	0.811742	4
S141	159.048	32.4239	61.5432	15.8181	19.2238	0.46845	4
S149	160.333	25.8377	65.2222	16.2989	19.3805	0.6755	4
S158	161.543	27.2038	65.7239	14.1981	20.141	0.834076	4
S166	159.844	30.2403	62.5756	15.3741	17.47	0.622714	4
S175	159.859	36.5235	55.0682	16.8542	16.3891	0.596207	4
S184	163.653	29.6608	72.263	14.7872	17.0327	0.632581	4
S194	157.432	33.2041	57	16.2837	19.7251	0.723952	4
S228	159.769	28.7347	65.7116	14.0193	20.8752	0.99531	4
S134	156.766	33.6094	62.4024	15.6539	19.5843	0.866686	4
S142	157.596	29.3817	58.0389	14.801	21.7033	0.748109	4
S150	158.926	30.8372	59.5349	15.541	17.8826	0.75257	4
S159	159.738	31.7162	66.6199	17.0578	20.4303	0.644537	4
S167	158.172	33.6985	54.6627	18.2686	15.5733	0.421224	4
S176	160.27	36.7982	54.9532	15.1576	17.069	1.10519	4
S185	153.411	25.4202	63.0591	13.6276	25.6802	0.83845	4
S195	160.408	34.1236	60.0737	15.0369	20.635	0.513999	4
S205	152.145	25.0286	54.5471	14.1287	26.4134	0.854542	4
S213	160.626	28.1913	56.171	14.9566	22.0578	0.636878	4
S221	160.163	27.6732	48.2403	14.6441	25.8206	0.699534	4
S229	149.962	27.521	56.4978	14.2419	26.1668	0.670234	4
S135	158.998	29.2989	78.3715	14.5562	19.8872	0.90228	4
S143	158.933	28.7206	64.2233	13.8266	19.4871	0.783269	4
S151	159.009	28.0388	59.5433	15.206	23.9432	0.853947	4
S160	163.993	28.8024	65.9127	14.9259	19.9214	0.518663	4
S168	155.956	34.428	58.3108	19.6007	14.9944	0.417513	4
S178	165.776	27.8453	63.0211	13.5419	21.8409	0.694269	4
S186	162.557	28.6271	63.5003	14.968	18.7147	0.642176	4
S196	154.502	34.0326	49.0649	16.0796	19.5706	0.547724	4
S206	160.191	24.5404	56.2885	13.9049	26.0192	0.62463	4
S214	150.565	29.4727	56.7135	15.1273	19.7719	0.785202	4
S222	156.564	29.6782	62.8262	15.1725	20.7932	0.791041	4
S230	161.583	26.5982	63.3327	15.4366	20.858	0.861804	4
S136	160.609	32.4825	63.861	14.8335	19.9254	0.771562	4
S144	161.902	27.5202	64.8668	14.1141	17.3375	0.847289	4
S153	162	24.519	77.0747	14.8019	22.3136	0.941566	4
S161	160.845	28.6944	62.8021	13.0184	22.9812	0.99791	4
S169	158.629	30.7196	62.1494	15.0114	19.6529	0.91761	4
S179	151.345	26.8715	56.8256	13.16	22.7813	0.77911	4
S187	153.612	25.1069	54.5743	14.5792	24.4207	0.741791	4
S197	161.605	30.4412	58.8915	15.3332	21.7881	0.801379	4
S207	157.938	28.1049	58.1838	14.5545	28.0284	0.700595	4
S215	158.532	29.6105	57.3445	14.534	20.893	0.926679	4
S231	161.26	29.7124	56.1738	15.6973	15.4607	0.359926	4
S137	163.044	27.9755	67.4048	14.566	22.7713	0.999797	4
S145	163.3	28.48	56.0125	14.0645	19.4528	0.753648	4
S154	159.796	27.6393	65.4236	14.601	20.2329	1.52302	4
S162	158.733	28.9951	62.9407	15.0112	20.9277	0.853223	4
S180	159.608	23.7712	49.8936	14.2751	27.115	0.733776	4
S188	159.682	27.9837	72.1422	15.6365	20.5163	0.965183	4
S198	160.096	28.4646	60.4095	14.9392	24.1705	0.576017	4
S216	158.712	28.7995	70.8493	15.2349	21.9453	1.13213	4
S224	161.055	25.8341	62.4122	14.6525	16.4669	0.452471	4
S232	160.854	28.2679	64.1854	15.0382	17.7023	0.616265	4
S138	156.173	31.0294	59.6292	14.4955	22.6938	1.06741	4
S146	163.24	25.5333	75.814	14.3669	18.9563	0.753953	4
S155	161.988	30.0759	69.1976	15.86	23.0216	0.563884	4
S163	167.993	30.5506	84.2706	14.3379	16.8725	0.699527	4
S172	155.857	33.3379	59.8831	16.9302	17.5585	0.603721	4
S181	158.887	29.8917	57.8629	14.6846	17.4485	0.626284	4
S190	159.396	34.4203	64.0093	15.843	19.5761	0.74116	4
S199	152.251	30.4188	52.3338	16.2074	19.1083	0.686804	4
S209	158.931	25.5947	62.7726	14.8823	19.5361	0.520466	4
S217	151.634	26.1405	59.5809	15.6896	18.6257	0.590598	4
S233	160.317	27.0498	56.3385	14.989	17.4063	0.654279	4
S139	164.64	28.9354	61.5629	14.8038	18.6824	0.94716	4
S147	163.475	28.0316	65.8138	14.895	20.7238	0.754124	4
S156	159.716	23.9486	51.4604	14.0531	27.7138	0.25515	4
S164	155.999	31.8653	55.3985	15.6047	21.8428	0.796528	4
S173	156.65	35.5132	57.0926	16.5658	16.0024	0.795101	4
S182	163.203	28.6123	71.9108	15.3618	18.939	0.757482	4
S191	160.337	34.6444	60.6273	17.2234	20.2681	0.784905	4
S200	158.182	30.3019	57.716	15.6962	22.1644	0.660065	4
S210	162.027	27.3198	69.325	14.779	14.6455	0.607521	4
S218	157.989	25.647	63.3663	15.1288	22.4305	0.511726	4
S234	158.31	27.2733	58.6567	13.6489	18.035	0.533686	4
S235	158.246	27.6632	55.0947	15.4717	20.0838	0.422115	4
S243	156.516	31.0559	63.4415	14.9961	22.12	0.687573	4
S251	156.664	27.4418	61.2352	14.812	18.1781	0.68314	4
S259	149.57	28.6598	43.3982	15.2141	21.7916	0.560364	4
S267	153.172	26.7043	53.6411	14.334	21.6659	0.673812	4
S275	155.876	24.6034	57.1854	13.6198	24.9801	0.843104	4
S291	153.401	27.8546	62.6303	15.4714	26.1625	0.456603	4
S299	157.95	26.4434	55.2749	14.4093	22.9606	0.505746	4
S307	152.871	28.7215	62.2795	14.24	21.9047	0.699072	4
S315	160.989	26.7917	60.9485	15.3715	24.3428	0.50035	4
S323	156.963	27.3146	59.9415	14.5707	26.1411	0.67131	4
S244	158.973	26.7799	59.1566	15.1156	25.3145	0.630556	4
S252	153.027	29.2371	48.9513	15.1511	23.3546	0.652962	4
S260	153.051	29.9555	49.6035	15.5811	21.3565	0.702622	4
S268	153.837	28.1296	55.4062	15.3045	24.7637	0.691619	4
S276	159.395	27.047	65.938	14.4038	21.2111	1.06084	4
S292	156.656	25.3477	57.5143	14.8759	18.2379	0.420704	4
S300	161.868	25.7368	69.6237	14.7238	21.0095	0.808342	4
S308	150.499	27.3369	55.0622	15.1091	22.8522	0.595834	4
S316	160.225	27.2602	60.0681	14.4837	21.3964	0.704492	4
S324	150.469	26.0881	51.7604	14.7727	22.0883	0.574631	4
S237	161.543	27.3103	52.584	14.6032	17.2114	0.523988	4
S245	155.122	27.7963	53.4899	14.8562	20.4473	0.532859	4
S253	153.411	28.1434	58.5528	15.1576	20.0167	0.843058	4
S269	157.565	26.0602	47.5909	14.8701	20.8657	0.392607	4
S293	152.428	26.6919	60.6011	15.0822	21.2232	0.816149	4
S301	165.35	26.818	87.237	14.1375	19.0967	0.85983	4
S309	153.863	34.5841	54.8888	15.7853	19.7415	0.620144	4
S317	162.994	24.5966	58.3522	13.8445	24.4342	0.849266	4
S325	153.519	23.9508	59.4769	15.2901	22.2328	0.627752	4
S238	161.351	25.9396	64.7229	14.5401	21.8602	0.968511	4
S246	152.91	27.5193	55.5872	13.8948	20.9674	0.795667	4
S254	147.822	27.2607	32.8187	14.5237	19.2789	0.270243	4
S262	148.386	28.0394	39.2588	15.1516	19.5065	0.386751	4
S270	157.083	25.8077	65.4535	13.9707	25.536	1.01032	4
S278	161.085	27.2433	67.7028	15.4429	19.2288	0.49456	4
S294	150.297	23.7431	47.9234	15.5413	22.353	0.386105	4
S302	157.82	26.9215	62.9265	14.3104	21.3491	0.639556	4
S310	157.7	29.2439	57.9877	14.7939	18.7057	0.630264	4
S326	158.108	27.0078	66.4705	14.888	19.9273	0.885301	4
S239	158.25	28.4295	61.4005	14.8103	23.4772	0.786142	4
S247	145.808	27.5159	41.7341	14.1957	19.8949	0.50919	4
S255	145.839	27.7614	50.8887	14.3465	21.2007	0.586647	4
S263	147.779	29.1042	47.0764	14.691	17.9034	0.630407	4
S271	159.236	24.8412	70.338	13.6953	28.7083	1.08494	4
S287	167.092	25.6577	72.0793	14.7531	19.9155	0.712715	4
S295	161.152	25.2655	66.9079	14.3007	24.3034	0.26484	4
S303	160.397	28.5571	54.2091	15.6153	20.5608	0.48077	4
S311	161.463	29.2214	59.4601	14.5511	16.1832	0.788803	4
S319	154.641	26.4693	52.3995	14.9426	16.8046	0.558916	4
S327	157.723	24.634	59.2587	14.5503	25.7948	0.578202	4
S240	160.824	26.9382	65.0568	14.3812	21.0161	0.755244	4
S248	151.688	25.2011	53.7247	14.7146	28.6094	0.754097	4
S256	148.248	27.9881	51.362	14.2781	20.9103	0.712087	4
S264	147.268	28.7196	48.7453	15.6198	19.2048	0.556795	4
S272	153.581	25.1667	52.1007	14.7407	29.6608	0.697296	4
S288	149.244	25.4681	49.6656	14.781	23.4751	0.535244	4
S296	168.551	26.9091	65.2885	15.4628	23.0178	0.575623	4
S304	159.624	27.4378	66.4811	15.5816	20.1005	0.868189	4
S312	161.983	26.4365	80.4751	14.6417	25.1418	0.68332	4
S320	147.951	27.5305	48.7287	14.8691	19.4829	0.528695	4
S328	157.723	25.623	58.4263	15.3509	19.3156	0.509802	4
S249	150.247	30.3361	51.5219	14.4048	22.0039	0.53346	4
S257	150.36	27.6358	51.7918	13.7664	22.044	0.675744	4
S265	145.107	27.0633	37.9329	14.8549	20.8208	0.360766	4
S273	162.97	23.3556	57.7985	14.8629	26.8869	0.615575	4
S297	169.801	25.5733	72.5155	14.5375	23.4666	0.54898	4
S305	156.609	24.5956	68.5658	14.5397	24.13	0.607285	4
S313	158.211	24.2024	64.1986	13.8312	29.4459	0.851945	4
S321	162.069	25.6827	76.1964	15.0898	21.2619	0.721921	4
S329	150.06	26.1687	49.8649	15.2753	20.4057	0.431459	4
S242	161.038	25.7802	55.4867	14.401	23.7895	0.722564	4
S250	152.408	27.3136	50.5484	14.4432	24.4089	0.591123	4
S258	149.793	27.3607	52.0491	14.865	21.6869	0.628776	4
S266	156.619	26.9394	46.534	14.4656	20.8887	0.180308	4
S282	158.386	31.0918	53.0982	15.4083	18.7862	0.637378	4
S298	164.326	26.2816	76.6188	13.995	22.023	0.777689	4
S306	159.294	23.9411	66.7234	14.8254	26.8168	0.510666	4
S314	156.696	28.0735	53.7878	14.6415	22.2823	0.923916	4
S322	154.4	31.4867	54.7146	16.0243	21.6498	0.673045	4
S339	155.123	26.4303	67.7579	15.4581	19.8514	0.609209	4
S347	150.044	28.6067	41.5373	14.8774	19.0899	0.55377	4
S357	154.392	29.7168	60.6685	16.4501	18.9616	0.495475	4
S365	157.987	35.5406	60.1632	15.2505	18.5719	0.994783	4
S382	160.478	28.2631	67.4246	15.1607	20.181	0.729256	4
S398	161.257	28.2742	64.7087	14.8333	20.4953	0.600391	4
S407	160.753	31.2624	55.6459	14.9806	24.2014	0.734603	4
S415	157.915	33.6437	63.6571	15.4141	22.6363	0.692658	4
S332	158.275	30.2036	61.3032	15.9388	21.751	0.619717	4
S340	159.766	26.8632	58.426	14.547	21.2624	0.659913	4
S348	149.529	28.0689	60.7231	14.9067	21.2036	0.762138	4
S358	162.977	36.437	64.9694	16.0362	17.048	0.67798	4
S366	159.212	35.0657	58.6803	15.8792	20.3125	0.597616	4
S374	163.202	31.6237	63.0405	15.1849	20.111	0.644188	4
S383	157.019	30.2971	55.7621	15.6203	20.6673	0.8565	4
S399	160.179	30.2795	58.8017	15.4081	16.4815	0.604958	4
S424	155.989	26.9448	64.7146	15.2209	25.4756	0.592502	4
S333	161.395	26.3234	70.4147	14.2264	22.5278	0.809219	4
S350	148.849	28.8165	46.5796	14.5585	20.0011	0.630273	4
S359	157.869	28.7993	61.8287	15.8173	19.4524	0.590992	4
S367	161.45	33.0933	57.9837	15.1198	17.5541	0.727534	4
S375	154.51	32.6664	59.3503	15.563	16.6683	0.782661	4
S384	156.15	27.9596	55.5574	15.2008	21.0423	0.553001	4
S392	159.417	30.3092	54.9691	15.2621	17.0382	0.742632	4
S400	160.173	27.1036	63.115	14.6496	19.6163	0.910795	4
S409	159.802	34.9885	55.9962	16.0666	19.6498	0.715868	4
S425	156.079	37.6191	50.0307	15.6987	17.2022	0.631651	4
S334	161.854	24.5536	57.8344	13.6371	30.3776	0.4056	4
S342	159.456	27.7518	60.1148	15.4264	20.0509	0.724081	4
S351	154.186	30.814	55.4107	15.4502	19.9282	0.718483	4
S360	153.084	31.6558	54.9355	16.2299	19.4061	0.625814	4
S368	161.216	32.236	56.8643	15.3862	18.4624	0.567144	4
S376	154.044	31.3652	64.8164	15.6935	18.388	0.865672	4
S385	161.163	29.1155	75.7812	15.5117	16.984	0.539854	4
S393	158.644	30.7154	54.2409	14.9457	17.233	0.662769	4
S402	161.103	27.4722	68.8637	14.6005	22.6055	1.05161	4
S410	171.963	26.9514	73.7431	15.3496	18.7032	0.813455	4
S418	158.943	35.9236	52.4033	16.3155	17.5628	0.521611	4
S426	163.791	36.8742	66.6487	16.4461	18.9817	0.626261	4
S343	149.673	28.6061	49.9191	13.7086	23.4979	0.80098	4
S353	150.011	27.7367	50.6836	14.4116	23.2813	0.485136	4
S361	154.708	31.1109	65.9463	16.0621	18.8967	0.841154	4
S369	162.361	30.8644	70.6915	15.2456	18.7398	1.00841	4
S377	157.652	30.9407	60.1219	17.0854	19.0515	0.608507	4
S386	168.959	26.6965	62.8148	15.488	19.7682	0.774611	4
S394	161.706	29.0775	64.8172	15.9188	20.5561	0.925602	4
S403	161.119	30.0302	76.9792	14.8194	16.6085	0.677842	4
S411	154.018	32.885	60.3802	15.2268	22.7426	0.937611	4
S344	155.087	31.2102	59.7576	16.2108	19.5933	0.809729	4
S354	156.773	30.2445	50.3152	15.6528	20.0187	0.802802	4
S362	158.288	29.2952	73.6837	15.1156	24.9497	0.734951	4
S378	159.288	31.2215	59.4227	15.3961	21.1408	0.952884	4
S387	156.355	31.4752	62.5261	16.4103	19.4901	0.587417	4
S395	161.956	27.6368	58.0361	15.3258	20.6774	0.682133	4
S412	159.25	31.0197	54.1146	15.846	17.6214	0.798737	4
S420	158.468	29.2052	58.9482	15.8818	23.0595	0.655852	4
S428	156.492	30.4386	64.6284	13.8696	20.5449	1.09156	4
S337	159.532	23.2202	63.7398	13.812	29.5796	0.837341	4
S345	154.781	34.5043	56.0522	16.3308	19.8607	0.744827	4
S355	158.448	33.3455	60.5218	15.3144	19.7159	1.05493	4
S363	160.99	34.4422	43.1553	16.257	18.6006	0.47871	4
S371	162.22	29.2896	57.4048	14.7459	18.9991	1.0528	4
S379	158.49	30.0556	52.9137	16.3279	17.7521	0.789994	4
S396	160.362	30.4577	60.2539	15.1504	19.6526	0.834088	4
S405	163.144	28.6129	61.0882	15.4065	17.0277	0.577604	4
S413	160.881	30.2661	57.497	15.0661	20.3964	0.515632	4
S421	156.981	28.4213	63.2583	15.7815	23.1165	0.825993	4
S429	156.479	30.4457	60.9127	15.2163	20.3718	0.818526	4
S338	155.904	27.4265	65.3188	14.6943	19.8172	0.769725	4
S346	147.653	27.946	48.0079	15.4241	19.7299	0.602844	4
S356	162.576	36.8795	64.8961	16.5307	16.4027	0.624931	4
S364	158.334	31.2169	66.0332	14.239	24.1158	0.926755	4
S372	159.894	33.3749	50.7496	17.1193	14.302	0.603815	4
S380	155.592	34.0879	61.947	15.3999	19.5468	0.682011	4
S389	159.543	30.6994	57.0477	16.1828	18.4483	0.574952	4
S397	159.493	28.9231	60.6495	15.3241	19.2181	0.605528	4
S406	162.928	29.8681	59.3285	14.6041	18.7931	0.836803	4
S414	150.198	31.3821	55.2989	15.7244	20.7983	0.715364	4
S430	158.851	33.9948	54.3071	16.0291	15.118	0.486135	4
S431	158.913	37.6323	55.9225	17.8193	17.8762	0.503229	4
S432	161.155	33.9264	59.1499	15.5456	19.0977	0.733354	4
S433	159.065	33.7969	61.327	15.6052	18.9055	0.918778	4

## Sheet: supp_2
Supplementary Table s2. The summary statistics and broad-sense heritability for grain yield (YP), plant height (PH), days to flowering (DF), 500 seed weight (SW), seed protein (PR), and oil content (OL) at each site.
Trait	Site	Range	Mean ± SD	Heritability(H2)
Grain yield	1	0.02 - 4.00	1.89 ± 0.71	0.84 (0.03)
	2	0.05 - 4.09	1.21 ± 0.54	0.73 (0.04)
	3	0.06 - 1.51	0.66 ± 0.27	0.51 (0.04)
	4	0.09 - 1.84	0.72 ± 0.25	0.48 (0.03)
Plant height	1	48.0 - 164.0	109.98 ± 15.21	0.92 (0.03)
	2	64.4 - 178.8	118.52 ± 14.47	0.91 (0.02)
	3	31.0 - 95.0	61.84 ± 9.41	0.49 (0.04)
	4	26.0 - 94.0	59.29 ± 9.41	0.63 (0.06)
Days to flowering	1	151 - 184	158.21 ± 3.44	0.93 (0.02)
	2	131 - 170	159.95 ± 3.42	0.70 (0.03)
	3	143 - 171	157.04 ± 4.34	0.98 (0.01)
	4	144 - 174	157.99 ± 4.40	0.98 (0.01)
Seed weight	1	10.24 - 34.29	19.56 ± 3.26	0.98 (0.01)
	2	11.36 - 31.07	18.77 ± 3.20	0.96 (0.01)
	3	9.35 - 34.01	20.41 ± 3.11	0.96 (0.01)
	4	13.78 - 34.22	20.93 ± 3.12	0.97 (0.01)
Seed oil content	1	24.0 - 43.1	31.83 ± 3.59	0.98 (0.01)
	2	23.3 - 42.2	30.71 ± 3.64	0.96 (0.01)
	3	22.8 - 40.1	29.69 ± 3.12	0.96 (0.01)
	4	21.6 - 40.2	29.35 ± 3.23	0.97 (0.01)
Seed protein content	1	12.3 - 22.9	15.25 ± 0.83	0.80 (0.03)
	2	12.3 - 23.8	15.47 ± 0.87	0.79 (0.03)
	3	13.4 - 20.0	15.92 ± 0.76	0.83 (0.03)
	4	12.1 - 20.5	15.14 ± 0.94	0.78 (0.03)

## Sheet: supp_3
Supplementary Table s3. Log-likelihood values for model 2 fitted with and without G x E interaction.
	SW	PH	DF	YP	OL	PR
noGXE	-3103.62	-10247	-5813.11	920.495	-3199.93	-529.97
GXE	-2978.55	-10093.7	-5469.03	1045.15	-3042.95	-482.431

## Sheet: supp_4
Supplementary Table s4. Variance components and genetic correlation (rGoverall, with standard error in parenthesis) were estimated with the homogenous linear mixed model (model 2) for the six traits with combined environments
vairance component\Trait	YP	PH	DF	SW	OL	PR
Accessions	0.057	77.5	8.413	9.114	10.11	0.341
ENV.Accessions	0.061*	32.947*	4.230*	0.517*	0.59*	0.089*
Residual	0.133	53.749	3.469	0.907	0.908	0.312
rGoverall	0.48 (0.02)	0.70 (0.02)	0.67 (0.02)	0.95 (0.01)	0.94 (0.01)	0.79 (0.02)
*: G × E interaction covariance was significant at 0.05 level.

## Sheet: supp_5
Supplementary Table s5. The Akaike information criterion (AIC), Bayesian information criterion (BIC), and log-likelihood values for model 2 and model 3.
Trait	model2				model3
	AIC	BIC	LogL		AIC	BIC	LogL
YP	-2084.31	-2065.78	1045.15		-4206.78	-4046.17	2129.39
PR	970.86	989.4	-482.431		175.27	335.94	-61.6363
PH	20193.4	20212	-10093.7		18786.1	18947.2	632.695
OL	6091.9	6110.44	-3042.95		5727.94	5888.6	-2837.97
DF	10944.1	10962.7	-5469.03		8915.04	9076.23	-4431.52
SW	5963.1	5981.64	-2978.55		5537.57	5698.23	-2742.78

## Sheet: supp_6
Supplementary Table s6. MTA Z-score and p-values from meta-analysis and phenotypic variance explained by MTA as SNP effects for DF at each site (SNPs in bold are the shared MTAs).
SNP	Pseudochr.	pos	MAF	sites	Z-score	p-value	Direction	sites 1	site 2	site 3	site 4
Locus33486	1	82845950	0.223	1	3.986	6.73e-05	++++	0.1036	0	0.0471	0.0374
Locus5628	1	83711358	0.39	1	4.167	3.08e-05	++++	0.0733	0	0.0431	0.0453
Locus11673	2	9380896	0.077	1	-3.635	0.000278	----	0.1767	0.1043	0	0.0337
Locus23203	4	5843776	0.09	1	-5.009	5.48e-07	----	0.1796	0.124	0.1431	0.1046
Locus28859	4	5813703	0.088	1_2	-4.396	1.1e-05	----	0.2	0.146	0.0784	0.0337
Locus14939	7	57966689	0.178	4	-4.575	4.75e-06	----	0.037	0.0267	0.0415	0.0761
Locus14876	7	32114220	0.208	4_3	-5.422	5.89e-08	----	0.0765	0.0213	0.1482	0.1662
Locus32938	7	58037381	0.138	1	-4.993	5.95e-07	----	0.07	0.0592	0.0638	0.068
Locus31596	8	6962395	0.252	4_3	3.622	0.000293	++++	0	0	0.0631	0.0616
Locus9819	8	79766528	0.101	1	4.598	4.26e-06	++++	0.113	0.0628	0.0424	0.1012
Locus25179	9	1995307	0.162	4_3	-3.525	0.000424	++--	0	0	0.2375	0.2865
Locus13705	9	18448931	0.352	1	-3.687	0.000227	----	0.0581	0.0406	0.0064	0
Locus2296	9	10886371	0.115	1_3	4.481	7.43e-06	++++	0.081	0.0316	0.0757	0.0365
Locus7277	11	18299585	0.104	1	4.194	2.74e-05	++++	0.1254	0.0406	0.0062	0.0428
Locus8764	12	4981428	0.107	3	-3.299	0.000972	----	0.0101	0	0.169	0.1323
Locus28682	12	466110	0.459	2	-4.78	1.75e-06	----	0.039	0.0385	0.0267	0.0252

## Sheet: supp_7
Supplementary Table s7. MTA Z-score and p-values from meta-analysis and phenotypic variance explained by MTA as SNP effects for PR at each site (SNPs in bold are the shared MTAs).
SNP	Pseudochr.	pos	MAF	sites	Z-score	p-value	Direction	site 1	site 2	site 3	site 4
Locus3686	3	77850848	0.17	2	-4.71	2.48e-06	----	0.0411	0.1208	0.0331	0.0218
Locus7941	5	74319098	0.063	1_2_4	-6.018	1.77e-09	----	0.3378	0.1914	0.033	0.1817
Locus3057	7	15110222	0.057	1_2_4_3	-8.97	2.95e-19	----	0.3396	0.369	0.2997	0.3555
Locus9819	8	79766528	0.101	2_4_3	5.709	1.14e-08	++++	0.0678	0.1252	0.188	0.1216
Locus17302	12	1089790	0.099	2	-4.555	5.24e-06	----	0.0797	0.2132	0.0423	0.0569

## Sheet: supp_8
Supplementary Table s8. MTA Z-score and p-values from meta-analysis and phenotypic variance explained by MTA as SNP effects for PH at each site (SNPs in bold are the shared MTAs).
SNP	Pseudochr.	pos	MAF	sites shared	Z-score	p-value	Direction	site 1	site 2	site 3	site 4
Locus23682	0	0	0.126	2	-4.189	2.81e-05	----	0.0683	0.1278	0.0654	0.0025
Locus5628	1	83711358	0.39	2_3	4.638	3.51e-06	++++	0.0071	0.0983	0.0597	0.0169
Locus1801	2	18261778	0.156	4	3.588	0.000333	++++	0.0504	0.0547	0	0.1313
Locus3232	2	68331883	0.052	4	-5.057	4.25e-07	----	0.1289	0.1465	0.0527	0.3482
Locus6169	2	2359224	0.363	1_2	-5.389	7.07e-08	----	0.0712	0.132	0.0599	0.0449
Locus7196	2	3898512	0.369	1_2	5.31	1.09e-07	++++	0.0893	0.1248	0.0493	0.0327
Locus22104	2	3897157	0.373	2	-4.567	4.94e-06	----	0.0389	0.0998	0.0377	0.0106
Locus6025	3	9719090	0.168	4	-3.51	0.000448	--+-	0.0488	0.0607	0	0.0817
Locus32956	3	16870316	0.138	4	-4.431	9.36e-06	----	0.0754	0.0408	0.006	0.1218
Locus8715	5	80474203	0.322	1	3.468	0.000524	++++	0.0528	0.0158	0.0127	0
Locus21012	5	69117695	0.088	2_4	-4.349	1.37e-05	----	0.0838	0.1506	0.026	0.1852
Locus13095	6	14606706	0.316	1_2	-4.189	2.81e-05	----	0.0741	0.0804	0	0.0153
Locus26979	6	14689723	0.347	2	-4.173	3.01e-05	----	0.031	0.0727	0.0149	0.0322
Locus27528	8	85928248	0.234	1_2	4.355	1.33e-05	++++	0.0957	0.1655	0	0.0265
Locus14488	9	932626	0.193	1	3.733	0.000189	++++	0.0556	0.019	0.0458	0
Locus21175	11	826647	0.266	1_2	-5.149	2.62e-07	----	0.1407	0.1033	0.0323	0.0243
Locus15327	12	5242520	0.19	2	3.499	0.000466	++++	0.0041	0.0632	0.0206	0.0109

## Sheet: supp_9
Supplementary Table s9. MTA Z-score and p-values from meta-analysis and phenotypic variance explained by MTA as SNP effects for SW at each site (SNPs in bold are the shared MTAs).
SNP	Pseudochr.	pos	MAF	sites	Z-score	p-value	Direction	site 1	site 2	site 3	site 4
Locus28749	1	6138382	0.093	1_3	-5.031	4.87e-07	----	0.101	0.0551	0.0803	0.0629
Locus1536	2	25492086	0.289	1	-4.475	7.62e-06	----	0.0542	0.0366	0.0089	0.0318
Locus18249	2	11651737	0.436	1_4_3	5.588	2.29e-08	++++	0.0392	0.0198	0.0768	0.0758
Locus9643	2	10384672	0.412	1_2_4_3	-6.408	1.48e-10	----	0.07	0.0846	0.0926	0.0779
Locus16177	2	13001763	0.473	1_2_4_3	6.131	8.74e-10	++++	0.1209	0.126	0.0926	0.0727
Locus27064	2	22345118	0.197	1_2_4_3	6.905	5.02e-12	++++	0.2055	0.1762	0.1597	0.1875
Locus33039	2	61155918	0.266	2_4_3	5.563	2.66e-08	++++	0.0589	0.0892	0.068	0.0822
Locus14895	4	9242008	0.363	1	-4.81	1.51e-06	----	0.0509	0.0234	0.0445	0.0413
Locus318	4	9138039	0.157	1_2_3	-5.553	2.81e-08	----	0.1302	0.127	0.114	0.0898
Locus25494	5	71682462	0.057	2	5.262	1.43e-07	++++	0.1508	0.2238	0.1333	0.1199
Locus23554	6	1503147	0.053	1	-4.571	4.86e-06	----	0.1692	0.0963	0.1146	0.1104
Locus13163	6	65800589	0.303	1	3.794	0.000148	++++	0.0509	0.0184	0.022	0
Locus3057	7	15110222	0.057	1_2_4_3	7.021	2.2e-12	++++	0.2163	0.1982	0.2215	0.2486
Locus24791	8	6955546	0.27	4	4.048	5.18e-05	++++	0.0098	0.0014	0.0344	0.0751
Locus20495	8	75343425	0.11	1	4.559	5.15e-06	++++	0.1547	0.0606	0.1031	0.0857
Locus19095	8	83854980	0.252	1	3.889	0.000101	++++	0.0528	0.0189	0.0108	0.0153
Locus28935	8	23744954	0.083	2_4_3	-5.623	1.88e-08	----	0.0869	0.1657	0.2169	0.1283
Locus30472	9	16185179	0.338	1_4	5.168	2.37e-07	++++	0.0489	0.043	0.0286	0.0541
Locus4248	9	21103203	0.118	2	-3.744	0.000181	----	0.0586	0.0712	0.0091	0
Locus17302	12	1089790	0.099	1_2	4.97	6.68e-07	++++	0.1606	0.2522	0.0463	0.0491

[truncated: 3 more sheets: supp_10, supp_11, supp_12]
